## Local and long-distance inputs dynamically regulate striatal acetylcholine during decision making

Lynne Chantranupong<sup>1</sup>, Celia C. Beron<sup>1</sup>, Joshua A. Zimmer<sup>1</sup>, Michelle J. Wen<sup>1</sup>, Wengang Wang<sup>1</sup>,  
Bernardo L. Sabatini<sup>1\*</sup>

<sup>1</sup> Howard Hughes Medical Institute, Department of Neurobiology, Harvard Medical School, Boston, United States

\* lead contact and corresponding author (email: [bsabatini@hms.harvard.edu](mailto:bsabatini@hms.harvard.edu))

### Abstract

Within the basal ganglia, striatal dopamine (DA) and acetylcholine (ACh) are essential for the selection and reinforcement of motor actions and decision making. *In vitro* studies have revealed a circuit local to the striatum by which each of these two neurotransmitters directly regulates release of the other. ACh, released by a unique population of cholinergic interneurons (CINs), drives DA release via direct axonal depolarization. In turn, DA inhibits CIN activity via dopamine D2 receptors (D2R). Whether and how this circuit contributes to striatal function *in vivo* remains unknown. To define the *in vivo* role of this circuit, we monitored ACh and DA signals in the ventrolateral striatum of mice performing a reward-based decision-making task. We establish that DA and ACh exhibit multiphasic and anticorrelated transients that are modulated by decision history and reward outcome. However, CIN perturbations reveal that DA dynamics and reward-prediction error encoding do not require ACh release by CINs. On the other hand, CIN-specific deletion of D2Rs shows that DA inhibits ACh levels in a D2R-dependent manner, and loss of this regulation impairs decision-making. To determine how other inputs to striatum shape ACh signals, we assessed the contribution of projections from cortex and thalamus and found that glutamate release from both sources is required for ACh release. Altogether, we uncover a dynamic relationship between DA and ACh during decision making and reveal modes of CIN regulation by local DA signals and long-range cortical and thalamic inputs. These findings deepen our understanding of the neurochemical basis of decision making and behavior.

## 1 Introduction

2  
3 The basal ganglia are a group of interconnected sub-cortical nuclei that integrate information from  
4 cortex, thalamus, and mid-brain dopamine centers, amongst others, to modulate goal directed behavior,  
5 including motor learning, habit formation, and decision making<sup>1-3</sup>. The striatum is the principal input  
6 structure of the basal ganglia, and its function is controlled by a complex array of neurotransmitters and  
7 neuromodulators arising from both local and distant sources<sup>4-7</sup>. Among these is dopamine (DA), which is  
8 released in striatum by long-range axons arising from midbrain ventral tegmental area (VTA) and  
9 substantia nigra pars compacta (SNc) neurons<sup>8-11</sup>. DA neurons (DANs) drive reinforcement learning by  
10 encoding reward prediction error (RPE), the difference between experienced and expected reward, and,  
11 mechanistically, by regulating aspects of neuronal and synapse function<sup>12-16</sup>. Disruption of DA signaling  
12 contributes to many debilitating psychomotor disorders, including Parkinson's disease and drug addiction,  
13 underscoring the significance of this neurotransmitter in striatal function<sup>17-19</sup>.

14 In addition to having the highest concentrations of DA and DA receptors in the mammalian brain,  
15 the striatum also contains some of the highest levels of acetylcholine (ACh)<sup>20,21</sup>. ACh is primarily released  
16 by local cholinergic interneurons (CINs), a specialized and rare cell type that comprises only 1-2 % of  
17 striatal neurons but that is tonically active and makes dense and extensive intra-striatal axonal  
18 arborizations<sup>22,23</sup>. Pioneering studies in primates revealed<sup>23-28</sup> that CINs characteristically reduce or 'pause'  
19 their firing in response to both appetitive and aversive stimuli<sup>23-28</sup>. These responses emerge over the  
20 course of learning, leading to the hypothesis that CINs, like DANs, modulate reinforcement learning and  
21 goal-directed behaviors. CIN pauses in turn may alter the plasticity of corticostriatal synapses to support  
22 procedural learning<sup>29</sup>, but a full understanding of how CINs contribute to striatal function is lacking.

23 Bidirectional interactions between DA and ACh release have been observed within striatum. In  
24 Parkinson's disease, loss of DA leads to a hypercholinergic state, and anti-cholinergic drugs were  
25 amongst the earliest treatments that alleviated symptoms of this disease<sup>30,31</sup>. During learning, increases  
26 in DAN activity coincide with CIN pauses, which are abolished upon DAN lesions<sup>23,24</sup>. Studies *in vitro*  
27 uncovered a local circuit by which DA and ACh directly influence each other. Synchronized firing of  
28 multiple CINs activates nicotinic acetylcholine receptors that are located on and depolarize DAN axons<sup>32-</sup>  
29<sup>35</sup>. If of sufficient amplitude, this axonal depolarization can induce a propagating axonal action potential  
30 that evokes DA release within striatum (**Fig. 1a**)<sup>35</sup>. In turn, DA potently inhibits CIN activity by acting on  
31 Type-2 DA receptors (D2Rs) expressed by CINs (**Fig. 1a**)<sup>36-38</sup>.

32 Despite a detailed understanding of the mechanisms of interaction between DA and ACh *in vitro*,  
33 if, when, and how these control DA and ACh levels to regulate striatal function *in vivo* are unknown. In  
34 terms of CIN-mediated control of DAN axons, it is unclear if sufficient CIN synchronization occurs and to  
35 what degree nicotinic ACh receptors are available to evoke DA release *in vivo*<sup>39</sup>. Furthermore, it is not  
36 known how much and when the potential CIN influence on DA signaling is functionally significant  
37 compared to the direct somato-dendritic modulation of DAN activity. The ability for CINs to evoke DA

38 release independently of somatic firing has been proposed as a mechanism to explain differences  
39 between DAN somatic activity and striatal DA levels<sup>40</sup>; however, recent studies report robust correlation  
40 between somatic and axonal signaling<sup>41,42</sup>. In terms of DA-mediated inhibition of CINs, although CIN  
41 pauses can be induced by activation of D2Rs, they can also be triggered by other striatal inputs, including  
42 cortical and thalamic glutamatergic projections and long-range GABAergic VTA inputs<sup>43–45</sup>. Indeed, CIN-  
43 specific deletion of the gene encoding D2Rs, *Drd2*, reduces, but does not abolish, the CIN pause in a  
44 reward-based task, suggesting additional sources are responsible<sup>46</sup>.

45 To provide a more complete understanding of what factors shape Ach release during reward-  
46 based decision making and how Ach release contributes to DA release, we examined striatal Ach and DA  
47 levels during a complex reward-based decision-making task in mice. We find that behavioral events drive  
48 multiphasic and anticorrelated responses in DA and Ach within striatum, and the history of choice and  
49 reward outcome alters the release of both neurotransmitters. Surprisingly, elimination of Ach release from  
50 CINs has minimal effects on DA dynamics during the task, suggesting that DA release in this context is  
51 largely insensitive to local, CIN-dependent regulation. In contrast, striatal Ach levels are shaped directly  
52 by local DA levels: DA reduces Ach levels in a D2R-dependent manner, and disrupting this regulation  
53 impairs performance of mice in the task. Finally, neurotransmitter release from cortical and thalamic  
54 axons are necessary for normal striatal Ach dynamics and levels. These results show that local striatal  
55 interactions between Ach and DA are neither fixed nor always dominant in driving the dynamics between  
56 the neuromodulators during decision making. Instead, DA modulates Ach levels only at specific times.  
57 Thus, the transients and resulting relationship between these two neuromodulators arise from a  
58 combination of intra- and extra-striatal inputs.

59

## 60 **Results**

61

### 62 **Striatal Ach and DA levels are dynamically regulated during reward-based decision making**

63 Decision making in probabilistic reward-reinforced tasks requires that individuals integrate internal  
64 and external cues in the context of a changing environment to flexibly make choices that maximize  
65 desired outcomes. To examine the local circuit interactions between striatal Ach and DA (**Fig. 1a**) during,  
66 and their contributions to, such behaviors, we monitored neuromodulator levels in mice performing a  
67 dynamic and probabilistic two-port choice task modeled after paradigms that engage striatal pathways  
68 and require striatal activity for optimal performance<sup>47–49</sup>. In this two-armed bandit task (2ABT), mice move  
69 freely within a box containing three ports (**Fig. 1b**). An LED cue above the center port signals that a  
70 mouse can initiate a trial by placing its snout (i.e., “poking”) in the center port. The mouse must then  
71 choose to poke into either a left or right port, each of which probabilistically delivers water after snout  
72 entry. In a block structure (30 rewards between block transitions) either the left or right port is designated  
73 as “high reward probability” ( $P(\text{reward})=P_{\text{high}}$ ) and the other port as “low reward probability” ( $P(\text{reward})=1-$   
74  $P_{\text{high}}$ ). To efficiently obtain rewards, the mouse must learn which is the high reward probability port in that

75 block and detect when block transitions occur. This task structure requires mice to employ flexible  
76 decision-making strategies and integrate information about previous trial outcomes to sample and choose  
77 ports.

78 Mice become proficient in this task and robustly alter their port selections at block boundaries  
79 (**Extended Data Fig. 1a**). In the middle of blocks, expert mice typically repeatedly choose the highly  
80 rewarded port and occasionally sample the low-reward probability port (**Extended Data Fig. 1a**).  
81 However, following successive unrewarded trials resulting from reward probability reversals at block  
82 transitions, they transiently increase their probability of switching ports between trials and rapidly change  
83 their choice to the new high reward probability port (**Extended Data Fig. 1c and 1d**). As a result of these  
84 strategies, proficient mice achieve highly similar decision times, reward rates, and switching rates  
85 (**Extended Data Fig. 1b**). During this behavior we capture the timing of port entries and withdrawals, the  
86 timing and number of licks at each port, and the trial outcomes. Center port entry and exit occur in rapid  
87 succession, followed by a delayed entry into the side port (**Extended Data Fig. 1e**). In rewarded trials, the  
88 water reward is triggered by side port entry, and mice repeatedly lick to consume the reward whereas in  
89 unrewarded trials the mice rarely lick the port (**Fig. 1c, Extended Data Fig. 1e third column**). Mouse  
90 behavior and evidence accumulation in the task can be summarized by a variety of models<sup>49–51</sup>. Here, we  
91 will employ a recursively-formulated logistic regression (RFLR, see methods) that was developed from a  
92 behavior task similar to the one we employ<sup>49</sup>. The RFLR model utilizes three parameters to capture,  
93 respectively, the tendency of an animal to repeat its last action (alpha,  $\alpha$ ), the relative weight given to  
94 information about current action and reward (beta,  $\beta$ ), and the time constant over which action and  
95 reward history decay (tau,  $\tau$ ). The RFLR model accurately captures the switching probability across  
96 multiple choice and outcome histories (**Extended Data Fig. 1g**) as well as the switching dynamics at  
97 block transitions (**Extended Data Fig. 1h**). RFLR coefficients are also comparable across expert mice  
98 (**Extended Data Fig. 1i**). Overall, mice achieve high proficiency on a probabilistic reward task, and their  
99 behavior can be accurately captured by a reduced logistic regression model.

100 To determine how DA and Ach signals change during this behavior, we used frequency-  
101 modulated fiber photometry to record the fluorescence of the genetically-encoded sensors for DA  
102 (dLight1.1<sup>52</sup> and Ach (GRAB-Ach3.0, abbreviated as Ach3.0)<sup>53</sup> expressed in separate hemispheres  
103 within the ventrolateral portion of the dorsal striatum (VLS) (**Extended Data Fig. 2a**), a region previously  
104 associated with controlling the behavior of mice in reward-based decision-making tasks<sup>54</sup>. Fluorescence  
105 transients were frequency-demodulated, down-sampled to 54 ms time bins (see Methods), and Z-scored  
106 over a 60 second rolling window. We observed robust and multiphasic DA and Ach transients in  
107 individual trials that differed depending on rewarded outcome (**Fig. 1c and 1d**). These transients reflect a  
108 combination of the release, reuptake, and degradation of the neuromodulator. Importantly, they are not  
109 observed in ligand-binding site mutants of the sensors expressed in VLS and recorded within the same  
110 behavioral context (**Extended Data Fig. 2b and 2c**), confirming their dependence on neuromodulator  
111 binding. Despite the lateralization of the task, the DA and Ach transients are similar for trials in which the

112 mouse selected the port ipsilateral versus contralateral to the fiber placement (**Fig. 1d, left and middle**);  
113 therefore, we combine data across both trial types (**Fig. 1d, right**).

114 To understand what behavioral features impact DA and Ach transients, we compared their  
115 profiles during rewarded and unrewarded trials. As expected, DA signals changed at the instances of  
116 task-relevant behavioral events, such as during movement from the center port to the side port (**Fig. 1c**  
117 **and 1d**). Furthermore, DA levels diverge depending on reward outcome, rising in rewarded trials but  
118 falling during unrewarded trials (**Fig. 1c and 1d**), consistent with encoding of RPE.

119 In contrast to past reports that striatal Ach is outcome-insensitive<sup>25</sup>, we found that reward  
120 outcome clearly modulates Ach transients. However, unlike DA, the sign of Ach transients is not strictly  
121 opposite in rewarded versus unrewarded trials (**Fig. 1d, lower right**). Further support for reward-outcome  
122 modulation of both DA and Ach is revealed during trials in which the LED cue that signals trial initiation is  
123 omitted. In the absence of this cue, the mice can still obtain rewards, but they are more unexpected.  
124 Compared to control rewarded trials, the DA transient in cue-omission rewarded trials is smaller during  
125 the center to side port transition but is larger when reward is delivered (**Fig. 1e**). Like DA, Ach transients  
126 are also affected by cue omission, although generally in the opposite direction to DA transients: the  
127 magnitude of the Ach transient is increased during center-to-side transition and decreased during reward  
128 acquisition.

129 Segregating the trials by reward outcome alone masks the complex and interrelated effects that  
130 choice and reward history can have on behavior and neurotransmitter release. Therefore, we subdivided  
131 rewarded and unrewarded trials by the task history and find that the outcome on the previous trial strongly  
132 modulates outcome-dependent DA and Ach levels on the current trial. To concisely represent choice and  
133 reward history, we use previously established annotation in which each trial is assigned a letter label that  
134 captures both the chosen action and the outcome: the letter identity signifies the port choice and the  
135 capitalization signifies outcome<sup>49</sup>. Specifically, 'A' and 'a' represent rewarded and unrewarded trials on  
136 one side, respectively, whereas 'B' and 'b' represent rewarded and unrewarded trials, respectively, on the  
137 alternate side. In a multi-trial sequence, the port selected in the first trial is designated a/A. For example,  
138 in a two-trial sequence, aB denotes an unrewarded trial in the first port ('a') followed by a rewarded trial in  
139 the other port ('B').

140 When a mouse chooses the same port in two consecutive trials, DA signals increase more and  
141 Ach signals decrease more following side port entry for a rewarded trial that was preceded by an  
142 unrewarded trial (aA) rather than a rewarded trial (AA), reflecting different reward expectations due to  
143 previous experience (**Fig. 1f, left**). Similarly, for an unrewarded trial, the magnitudes of the dip in DA  
144 levels and the concomitant rise in Ach levels are greater if it was preceded by a rewarded trial (Aa) rather  
145 than by an unrewarded trial (aa) (**Fig. 1f, right**). Interestingly, these effects of expectation on trial-  
146 outcome DA and Ach are absent if the mouse switches ports between trials: i.e., the signals following  
147 side-port entry are similar for AB and aB trials and similar for ab and Ab trials (**Fig. 1g**). However, on

148 these selection-port switch trials, the DA signals associated with the center-to-side port transition were  
149 greater when the previous trial was unrewarded (**Fig. 1g**). Thus, when a mouse makes the decision to  
150 switch ports from one trial to the next, it approaches this choice in a different state shaped by history;  
151 however, any outcome resulting from this switch is equally unexpected.

152 Across multiple instances in which reward expectation modulates both DA and Ach transients, we  
153 observed that changes in DA and Ach are often temporally coincident but in the opposite direction. This is  
154 in line with previous observations in primates that CIN pauses are time-locked with increases to DAN  
155 activity<sup>25</sup>. This apparent negative correlation may arise from a direct interaction between DANs and CINs  
156 (i.e. DA mediated inhibition of CIN activity; **Fig. 1a**) or, alternatively, point to opposite modulation of both  
157 signals by a common input. Nevertheless, during the task, the relationship between DA and Ach is  
158 neither simple nor fixed as there are periods in which both signals go up or down synchronously or  
159 independently, suggesting a flexible and dynamic coupling between the two neuromodulators.

160

### 161 **DA and Ach dynamics are driven by multiple behavioral events and action-outcome history**

162 To formally and quantitatively evaluate the contribution of behavior events to DA and Ach levels,  
163 we developed a general linear model (GLM) to predict neuromodulator levels from behavior (**Extended**  
164 **Data Fig. 3a**). In the simplest model, which we term the ‘base GLM’, we incorporated predictive variables  
165 based on key behavioral events: center port entry and exit, side port entry and exit, reward delivery, licks,  
166 and side port entries that occur outside of the trial structure. For each event, the model derived kernels  
167 are comprised of time shifted  $\beta$  coefficients that minimize an ordinary least squares (OLS) cost function.  
168 These kernels are convolved with impulse functions representing the timing of behavior events and  
169 summed to reconstruct the photometry signal (**Extended Data Fig. 3a**). Regularization was not required  
170 for this base GLM as training, validation, and test datasets yielded similar MSE, and incorporation of L1  
171 and/or L2 regularization did not improve model performance compared to OLS (**Extended Data Fig. 3b**);  
172 thus, the relatively few model parameters do not lead to overfitting. We find that this simple model  
173 captures most variance across the trial-associated data (DA GLM  $R^2 = 0.206$ ; Ach GLM  $R^2 = 0.206$ )  
174 (**Extended Data Fig. 3c and 3d, right**).

175 To assess the contribution of each behavioral variable to GLM performance, we performed a  
176 ‘leave-out analysis’ of individual features (**Extended Data Fig. 3e**). For both DA and Ach models, center  
177 entry and center exit are likely redundant as loss of either does not impact model fit. Meanwhile, omission  
178 of only side entry and reward variables greatly weakens the GLM performance for DA signals. In contrast,  
179 loss of side entry, reward, side exit and lick inputs all impair the GLM performance for Ach signals. These  
180 differences highlight the unique influence of each behavioral event on DA and Ach dynamics.

181 Although the base GLM robustly captures the true signals of both Ach and DA, there are  
182 discrepancies with the reconstructed signals across several histories (**Extended Data Fig. 3c and 3d,**  
183 **right**). Given the importance of choice and reward history for modulating the signals of both

184 neurotransmitters (**Fig. 1f and 1g**), we expanded the feature set of the base GLM to include side port  
185 entries segregated by the eight possible action-outcome combinations, which we term the ‘history GLM’  
186 (**Extended Data Fig. 4a and 4b**). Indeed, inclusion of these parameters reduced the MSE between the  
187 predicted and test data for both DA and Ach GLMs (**Extended Data Fig. 3e, + history MSEs**). This  
188 reflects an improvement in the ability of the history GLMs to capture the variance of the trial-associated  
189 data without overfitting (**Extended Data Fig. 3e**) (DA GLM  $R^2 = 0.213$ ; Ach GLM  $R^2 = 0.214$ ).  
190 Furthermore, despite the addition of multiple parameters, regularization was still not required for optimal  
191 model performance (**Extended Data Fig. 4c**). Altogether, by modeling DA and Ach signals with GLMs,  
192 we reveal the influence of multiple behavioral variables and action-outcome history on the dynamics of  
193 both neurotransmitters during decision making.

194

### 195 **Ach and DA levels are anticorrelated across trial types, except at moment of choice-evaluation**

196 Because DA and Ach may directly interact *in vivo*, we characterized the relationship between  
197 their patterns of release to determine if they support either the positive or negative interactions proposed.  
198 Comparison of the trial-averaged fluorescence signals and the GLM analyses suggest that such  
199 interactions exist: an overlay of DA and Ach dependent signals recorded from separate hemispheres  
200 reveals a striking reciprocal relationship between the two neurotransmitters during rewarded and  
201 unrewarded trials (**Extended Data Fig. 5a**). Nevertheless, following side port entry of unrewarded trials,  
202 DA dips while Ach rises twice (**Extended Data Fig. 5a, orange arrows**) which suggests a complex and  
203 potentially dynamic relationship between the two neurotransmitters (**Extended Data Fig. 5a, right**). Cross  
204 correlation analysis of these trial-segregated signals in which DA lags Ach reveals an anticorrelation that  
205 occurs with a positive time lag (**Extended Data Fig. 5b**), indicating that changes in DA are associated  
206 with delayed changes in Ach of the opposite sign. In addition, there is a positive correlation that occurs  
207 with a negative time lag, suggesting that changes in Ach are followed by changes in DA of the same sign.

208 To more accurately assess the dynamics of and relationship between DA and Ach transients, we  
209 performed simultaneous recordings of both neurotransmitters within the same hemisphere by  
210 coexpressing a red-shifted DA sensor, rDAh<sup>55</sup> and the green Ach sensor (**Fig. 2b, left**). To understand  
211 the impact of switching DA sensors, we exploited the fact that the release of DA is highly correlated  
212 across hemispheres within the same mouse (**Extended Data Fig. 5c**), allowing us to directly compare DA  
213 signals detected by rDAh versus dLight1.1. Both sensors yield similar signals, albeit with a smaller  
214 amplitude for rDAh (**Fig. 2a**), likely reflecting its slower kinetics and higher affinity for DA compared to  
215 dLight1.1. Simultaneous DA and Ach recordings within the same hemisphere (**Fig. 2b**) recapitulate what  
216 we observed with recordings from separate hemispheres. The continuous, non-trial segregated DA and  
217 Ach signals are highly anticorrelated with a positive time lag (**Fig. 2c**), as are the trial-segregated DA and  
218 Ach signals (**Fig. 2d, left**) and the residuals of these transients (**Fig. 2d, right**) (i.e. signal and noise  
219 correlations, respectively). These relationships are consistent with the proposed intra-striatal interactions

220 between Ach and DA, but they may also be independent of these direct interactions and arise from a  
221 common input that directly regulates DANs and CINs.

222 Cross-covariance analysis, as presented above, assumes a “wide-sense stationary” process in  
223 which the mean and variance of the signal do not change over time. This permits the covariance to be  
224 expressed as a function of one variable representing a time shift between the signals. However, during  
225 behavior both the mean and variance of DA and Ach levels change dynamically. Therefore, we performed  
226 full time-dependent covariance analysis, in which we calculate how variance about the mean of DA at one  
227 time point ( $t_1$ ) influences Ach at another time point ( $t_2$ ) (see Methods) (**Extended Data Fig. 5d**). This  
228 results in a 2-dimension function –  $K(t_1, t_2)$  (**Fig. 2e**) – characterized by a strong time-lagged negative  
229 covariance, which we call the off-diagonal (**Fig. 2f**) showing that, at most time points, changes in DA are  
230 followed by opposite sign changes in Ach approximately 100 ms later. However, the strength of the  
231 covariance varies as a function of time during the trial and, intriguingly, it nearly disappears when the  
232 animal enters the side port in both rewarded and unrewarded trials (**Fig. 2e, insets**). In addition, off band  
233 positive correlations emerge selectively as the animal approaches the side port (**Fig. 2e**). Thus, the  
234 relationship between DA and Ach is dynamic and context dependent. Taken together, these results are  
235 consistent with the proposed reciprocal interactions between DA and Ach. During most periods, DA  
236 release activates D2Rs on CINs, reducing CIN activity, and leading to a time-lagged negative correlation  
237 between these signals. At specific moments, such as when the animal approaches the side port, positive  
238 correlations consistent with Ach driven DA release appear whereas at other times the negative correlation  
239 is weakened. These dynamics might be driven by additional inputs upstream of CINs and DANs whose  
240 activity could momentarily override the direct interactions between DA and Ach.

241 We can further quantify the interactions between simultaneously recorded DA and Ach signals  
242 using a GLM that incorporates photometry as a predictive variable alongside the behavioral variables,  
243 such that DA dynamics can predict changes in Ach and vice versa. This model generated kernels of DA  
244 and Ach (**Fig. 2g**) which highly resemble the covariance function – both are dominated by a negative  
245 interaction occurring with opposite time shifts of approximately 100 ms. These kernels are then convolved  
246 with their respective photometry traces and added to the convolved behavioral variables to generate the  
247 predictions of Ach and DA, respectively. The photometry variable alone is insufficient to predict Ach and  
248 DA signals (**Extended Data Fig. 5e**) (DA GLM  $R^2 = 0.116$ ; Ach GLM  $R^2 = 0.171$ ), underscoring the  
249 importance of behavioral events in driving Ach and DA transients. Meanwhile, incorporation of these  
250 photometry kernels into history GLMs for DA and Ach improves model performance without overfitting  
251 (DA GLM  $R^2 = 0.336$ ; Ach GLM  $R^2 = 0.388$ ). Taken together, we establish that DA and Ach signals are  
252 anticorrelated throughout decision making, but this relationship is flexible and can be transiently  
253 disrupted, notably at the moment of choice evaluation.

254

255



256 **Ach release from CINs is not necessary for DA dynamics during decision-making**

257 To determine if CINs regulate striatal DA signals during decision making, we first tested if Ach  
258 release is sufficient to modulate *in vivo* DA levels in a manner as robust as what is observed *in vitro*<sup>32,34</sup>.  
259 Expression of the activating opsin Chrimson<sup>56</sup> in CINs in the VLS enables laser-dependent stimulation of  
260 Ach release in a head-fixed mouse on a wheel, evoking Ach levels that are nearly five-fold higher than  
261 those evoked during the 2ABT (**Extended Data Fig. 6a**). CIN activation during the 2ABT in a subset of  
262 trials increased DA release in both rewarded and unrewarded trials (**Extended Data Fig. 6b and 6c**);  
263 however, the effect is small compared to the magnitudes of CIN-evoked DA observed *in vitro* and of  
264 reward-dependent DA release *in vivo*.

265 We turned to loss of function experiments to assess if Ach release from CINs significantly  
266 contributes to DA dynamics during behavior. To abolish neurotransmission in CINs, we used Cre-  
267 conditional AAVs and *Chat-IRES-Cre* mice to selectively express tetanus toxin (TelC) and prevent  
268 synaptic vesicle fusion in CINs (**Fig. 3a and 3b**). Optogenetic activation of CINs in control striatal slices  
269 evokes DA release as measured by carbon fiber amperometry; however, this is abolished if CINs express  
270 TelC (**Fig. 3c**). Furthermore, Ach transients during rewarded trials are greatly suppressed by TelC  
271 expression in CINs compared to expression of a control protein, mCherry (**Fig. 3d**). Thus, TelC potently  
272 inhibits Ach release from CINs *in vitro* and *in vivo*.

273 In mice performing the 2ABT, we inhibited Ach release in the VLS of one hemisphere using TelC  
274 and compared DA release to the VLS within the other hemisphere in which CINs express a control protein  
275 (**Fig. 3e, left; Extended Data Fig. 7a**). Surprisingly, loss of Ach release did not perturb DA transients in  
276 rewarded or unrewarded trials recorded with dLight1.1 (**Fig. 3e**) or with rDAh in dual recordings in which  
277 we validate the suppression of Ach release (**Extended Data Fig. 7c**). In addition to comparing Z scored  
278 DA signals, we also analyzed the amplitudes of DA sensor fluorescence transients ( $\Delta F/F_0$ ) to address if  
279 TelC lowers the overall magnitude of DA release throughout the trial. The average fluorescence of  
280 dLight1.1 is larger in the hemisphere in which CINs express TelC (**Extended Data Fig. 7b, right**);  
281 however, this is difficult to interpret given the high variability of  $\Delta F/F_0$  across individual mice which can  
282 stem from varying autofluorescence and sensor expression levels (**Extended Data Fig. 7b, left**).  
283 Consistent with the lack of effect of Ach loss on DA dynamics in VLS, mice did not exhibit behavioral  
284 deficits except for a slight change in decision time (time from center port entry to side port entry)  
285 (**Extended Data Fig. 8a**). All other performance metrics such as reward rate, lose-switch rate, RFLR  
286 model fits, and the dynamics of port switching and high port occupancy were not significantly altered  
287 (**Extended Data Fig. 8a – 8d**).

288 Because the disruption of Ach release was limited to the VLS, the lack of effect on DA release  
289 may result from sustained synchronized CIN activity outside the VLS, which may be sufficient to drive DA  
290 release within the VLS. To address this possibility, we expressed TelC in CINs throughout a large fraction  
291 of the striatum using a multi-site injection approach (**Fig. 3f, left; Extended Data Fig. 7d**). This

292 widespread loss of Ach release affected behaviorally-evoked DA signals (**Fig. 3f**) but also induces severe  
293 behavioral defects, including impaired locomotion (**Extended Data Fig. 8e**), impaired switching rates and  
294 dynamics (**Extended Data Fig. 8f, 8h**), altered  $\alpha$  (stickiness in action selection) and  $\beta$  (weight given to  
295 new information) RFLR coefficients (**Extended Data Fig. 8g**). In addition, all GLM kernels underlying DA  
296 dynamics were changed by widespread TelC expression (**Extended Data Fig. 7e**) (mCh DA GLM  $R^2 =$   
297  $0.220$ ; TelC DA GLM  $R^2 = 0.075$ ). Although these perturbations confirm the importance of CIN-dependent  
298 Ach release for proper performance in this task, they make it difficult to discern if the perturbations of DA  
299 signals are due to Ach loss or due to behavioral alterations caused by Ach loss. However, despite severe  
300 striatum-wide loss in Ach, RPE encoding is still sustained by DA, such that DA rises during rewarded  
301 trials and falls during unrewarded trials (**Fig. 3f**) and the GLM kernels associated with side entry and  
302 reward maintain their opposing polarity (**Extended Data Fig. 7e**). Thus, the RPE encoding features of DA  
303 do not require CIN-mediated release but rather likely depend on changes in action potential firing  
304 generated in the SNc and VTA. Indeed, while suppression of Ach release did not alter DA levels,  
305 modulation of DAN activity does so robustly, as evidenced by a significant reduction in DA levels upon  
306 optogenetic inhibition of DANs via stGtACR2 (**Fig. 3g**). Altogether, we find that loss of Ach release within  
307 the VLS does not impair DA dynamics such that, although modulation of CIN activity is sufficient to drive  
308 DA release *in vivo*, the context in which it does so remains to be determined.

309

### 310 **D2Rs are necessary for DA-dependent inhibition of Ach levels**

311 During a trial, there are two periods in which Ach levels are depressed while DA levels rise: first,  
312 as the mice move from center to side port, and second, during rewarded trials following side port entry  
313 (**Fig. 2b**). Because these opposite signed changes in DA and Ach signals coincide, we hypothesize that  
314 D2Rs may mediate the depression of Ach levels. To test this possibility, we assayed if optogenetic  
315 manipulations of DA neurons *in vivo* affect striatal Ach levels and if any such effects are D2R-dependent.  
316 We increased and decreased DA levels in the VLS via photoactivation of excitatory and inhibitory  
317 optogenetic proteins Chrimson and Jaws<sup>56,57</sup>, respectively, expressed in SNc and VTA DANs in a head-  
318 fixed mouse on a wheel (**Fig. 4a**). These manipulations altered Ach levels in the direction opposite to  
319 optogenetically-evoked changes in DA levels, consistent with DA inhibiting Ach release (**Fig. 4b and 4c,**  
320 **left**). Importantly, these effects are D2R-dependent as they are abolished by administration of eticlopride,  
321 a D2R antagonist (**Fig. 4b and 4c, right**). Thus, changes in DA are sufficient to bidirectionally regulate  
322 Ach levels *in vivo*, consistent with basal engagement and dynamic modulation of DA-dependent inhibition  
323 of CINs.

324 Because D2Rs are expressed by other cell types in the brain and D2R-blockade has significant  
325 behavioral effects that prevent mice from performing the task<sup>58</sup>, we used an alternative method to  
326 determine if DA suppresses Ach release during the task. We employed a genetic strategy to knock-out  
327 D2Rs specifically in CINs and refer to this transgenic mouse line (*Chat-IRES-Cre; Drd2<sup>fl/fl</sup>*) as Drd2-cKO.

328 To confirm functional loss of D2Rs in CINs, we compared the ability of DA to reduce CIN firing in striatal  
329 slices from wild type versus *Drd2*-cKO mice (**Fig. 4d**). In wild type mice, release of DA following laser  
330 stimulation of channelrhodopsin-expressing DA neuron terminals robustly reduced CIN firing, as  
331 measured by cell attached recordings, but this effect is absent in CINs from *Drd2*-cKO mice (**Fig. 4e and**  
332 **4f**).

333 To determine how D2R loss in CINs affects Ach release during the 2ABT, we compared  
334 neuromodulator dynamics in the VLS of *Drd2*-cKO CIN mice with that in two control groups: *Chat-IRES-*  
335 *Cre* mice (referred to as WT), and *Drd2*-floxed mice (referred to as *Drd2*-ff). We found that loss of D2Rs in  
336 CINs abolished both instances of Ach suppression that coincide with a rise in DA levels (**Fig. 4g,**  
337 **bottom**): the Ach dip that normally occurs in all trials during center to side port transition is lost (**Fig. 4g,**  
338 **orange arrow**), and an additional peak of Ach emerges following side port entry in rewarded trials (**Fig.**  
339 **4g, green arrow**). Importantly, these changes occurred despite relatively unperturbed DA dynamics  
340 during the task across the three genotypes (**Fig. 4g, top**). Modeling these signals with a history GLM  
341 recapitulates these effects – DA kernels are comparable across the three cohorts (**Extended Data Fig.**  
342 **9c**). In contrast, all side-entry Ach kernels are greatly altered in *Drd2*-cKO mice, exhibiting an increase in  
343  $\beta$  coefficients at negative time shifts across all histories as well as an increase in  $\beta$  coefficients at positive  
344 time shifts for histories with a rewarded outcome on the current trial (**Extended Data Fig. 9b**) (WT DA  
345 GLM  $R^2 = 0.129$ ; *Drd2*-ff DA GLM  $R^2 = 0.122$ , *Drd2*-cKO DA GLM  $R^2 = 0.155$ ; WT Ach GLM  $R^2 = 0.202$ ;  
346 *Drd2*-ff Ach GLM  $R^2 = 0.262$ , *Drd2*-cKO Ach GLM  $R^2 = 0.214$ ). As a result, the relationship between Ach  
347 and DA signals in *Drd2*-cKO mice is severely disrupted (**Extended Data Fig. 9a**), with a significant  
348 reduction in both the magnitude of their anticorrelation (**Fig. 4h**) and the off-diagonal negative covariance  
349 (**Fig. 4i**). Thus, D2Rs are required for DA to inhibit Ach release *in vivo*.

350 To determine if D2R loss in CINs affects decision-making, we assessed the performance of *Drd2*-  
351 cKO mice in the 2ABT. General performance metrics (**Extended Data Fig. 10a**), block transition  
352 dynamics (**Extended Data Fig. S10b and S10c**), and RFLR coefficients (**Extended Data Fig. 10d**) are  
353 comparable across the three genotypes. Although *Drd2*-cKO mice exhibit a slightly altered decision time,  
354 lose-switch rate, and  $\alpha$  and  $\beta$  RFLR coefficients compared to *Drd2*-ff mice, this is not observed with WT  
355 mice, suggesting that there are baseline behavioral differences between the two control groups. However,  
356 consistent differences emerge between *Drd2*-cKO mice and both control groups when performance is  
357 parsed by history. *Drd2*-cKO mice are impaired in their ability to switch across multiple histories when  
358 compared to both *Drd2*-ff and WT cohorts, with significantly reduced switching rates in ab and Aa  
359 sequences (**Extended Data Fig. 10e**). This reveals a previously unknown role for D2R-dependent Ach  
360 pauses in enabling past choices and outcomes to promote complex changes in behavior. In conclusion,  
361 we find that D2Rs are required for DA to repress Ach levels during precise moments within a trial, and  
362 loss of this regulation impairs the ability of mice to modify switching behavior.

363

364 **Cortical and thalamic inputs drive changes in striatal Ach levels**

365 Although DA shapes Ach signals during decision-making, we observe additional fluctuations in  
366 Ach that are DA-independent. For example, in unrewarded trials, Ach signals remain repressed following  
367 side port entry, even in mice in which CINs lack D2Rs (**Fig. 4g, lower right**). Furthermore, additional  
368 inputs are required to drive the increases in Ach that occur upon side port entry and during the  
369 consumption period. Finally, the momentary disruption of the negative covariance between Ach and DA  
370 signals points to the existence of other factors that can alter Ach and DA dynamics (**Fig. 2e and 2f**).

371 To discover other potential sources of regulation of striatal Ach, we examined inputs to striatum  
372 from the cortex and thalamus, both of which synapse onto CINs and modulate their firing rates<sup>43,44,59</sup>. To  
373 determine if these regions project into the VLS, we performed retrograde tracing with cholera toxin. We  
374 find that a broad distribution of cells from multiple cortical regions send afferents into the VLS (**Fig. 5a**).  
375 Meanwhile, thalamic inputs into this striatal region originate predominantly from the parafascicular  
376 nucleus.

377 To assess the potential influence of glutamatergic inputs from cortex and thalamus on striatal  
378 Ach, we first determined if striatal glutamate and Ach signals are correlated. Using the glutamate sensor  
379 iGluSnFR<sup>60</sup>, we find that striatal glutamate levels vary during the task but are not lateralized (**Fig. 5b**),  
380 allowing us to again combine signals from ipsiversive and contraversive trials. Glutamate signals are  
381 suppressed prior to the choice and rise during side port entry in an analogous manner to Ach (**Fig. 5c**). In  
382 rewarded trials, glutamate exhibits an additional phase of sustained increase during consumption, which  
383 is absent in unrewarded trials (**Fig. 5c**).

384 The activities of cortical and thalamic terminals in VLS, measured with genetically encoded  
385 calcium sensors, coincide with glutamate release across both trial types, suggesting that both inputs can  
386 contribute to glutamate release in this region (**Fig. 5d, right**). To detect thalamic activity, we expressed  
387 jRCaMP1b, a red calcium indicator, in thalamic somas of separate animals and recorded terminal activity  
388 in VLS (**Fig. 5d, upper left**). Timing offsets between jRCaMP1b and Ach3.0 signals are likely due to  
389 varying sensor kinetics<sup>53,61</sup>. Meanwhile, a multisite injection strategy was required for cortical inputs given  
390 their widespread distribution (**Fig. 5d, bottom left**). In addition, we found that a brighter calcium sensor,  
391 GCaMP8, was necessary for detection of cortical signals arising from these dispersed sources.  
392 Altogether, these data demonstrate substantial coincident dynamics from glutamatergic inputs into  
393 striatum, providing a basis for the possibility that cortical and thalamic inputs can drive changes in Ach  
394 levels.

395 To test whether each input is required for Ach release, we expressed TeIC unilaterally in the  
396 thalamus or cortex. For cortical inputs, we used a retrograde AAV approach in *Vglut1-IRES-Cre* mice to  
397 restrict expression of the toxin in only cells that project into VLS (**Fig. 5f top, Extended Data Fig. 11b**).  
398 However, for thalamic inputs, we could not use a retrograde approach in *Vglut2-IRES-Cre* mice due to  
399 *Vglut2* expression in cortical regions (Allen Institute); therefore, we instead injected TeIC directly into the

400 thalamus (**Fig. 5e top, Extended Data Fig. 11a**). This perturbation impaired the performance of animals  
401 on the 2ABT, reflecting the importance of both inputs in regulating striatal function. Although TelC-  
402 expressing animals could achieve a comparable, albeit lower, reward rate than control mice, they  
403 exhibited impaired switch dynamics following rewarded trials (**Extended Data Fig. 12a and 12e**), block  
404 transitions (**Extended Data Fig. 12b and 12f**) and across multiple choice-outcome histories (**Extended**  
405 **Data Fig. 12c and 12g**). Consistent with this impairment, the RFLR model description revealed a  
406 reduction in the  $\beta$  and an increase in  $\tau$  reflecting weakened incorporation of new evidence and faster  
407 information decay, respectively (**Extended Data Fig. 12d and 12h**). Mice with thalamic TelC expression  
408 performed more poorly than those with cortical manipulations. This may be because a large majority of  
409 thalamic inputs into striatum received TelC whereas for cortical inputs, only those that project into VLS  
410 expressed the toxin.

411         Loss of neurotransmission from each region robustly dampened Ach transients across all trials,  
412 as seen in the lowered  $\Delta F/F_0$  of the Ach sensor signal (**Fig. 5e and 5f, bottom**). The degree of  
413 suppression of  $\Delta F/F_0$  was strong and consistent across mice and sufficient to overcome any underlying  
414 variability in signals, unlike CIN perturbation of DA levels (**Extended Data Fig. 11c**). Analysis of the  
415 remaining Ach transients reveals unique ways that cortical and thalamic inputs modulate Ach levels. In  
416 unrewarded trials, loss of cortical but not thalamic inputs perturbs Ach transients following side port entry,  
417 suggesting a specific role for the cortex in driving this signal. In addition, only loss of the thalamic input  
418 shifts the timing of Ach release, which may reflect the greater degree of behavioral disruption in mice with  
419 thalamic TelC injections. These results point to cortical and thalamic inputs as candidates for driving the  
420 momentary disruption in covariance between Ach and DA (**Fig. 2e**). Testing this hypothesis requires  
421 perturbation of these inputs; however, this results in altered Ach signals, which in turn prevents  
422 calculation of the covariance between DA and Ach. Overall, our results reveal that both the cortex and  
423 thalamus are required to sustain Ach levels during decision-making, and each input can uniquely alter the  
424 dynamics of striatal Ach during a trial.

425

## 426 **Discussion**

427         DA and Ach are critical neurotransmitters that directly modulate each other's release *in vitro*.  
428 However, whether these interactions regulate neurotransmitter levels *in vivo*, particularly during decision  
429 making, is not known. To address this, we evaluated how striatal DA and Ach dynamics are regulated by  
430 the proposed bidirectional circuit during a task that requires mice to make choices flexibly within a  
431 changing environment. We revealed that DA and Ach signals are generally anticorrelated across time, but  
432 that this relationship is dynamic and modulated by action, reward, and their histories. Whereas striatal  
433 Ach release does not modulate DA dynamics, DA exerts a key influence on Ach signals via D2Rs.  
434 Without this interaction, the ability of action and reward history to influence decision-making is diminished.  
435 In addition to DA, cortical and thalamic inputs concurrently drive Ach release throughout the trial.

436 Altogether, we define precise roles for local and long-range glutamatergic inputs in modulating striatal  
437 Ach signals (**Fig. 5g**), and we highlight the complex coordination of multiple neurotransmitter interactions  
438 during decision-making.

439

#### 440 ***CIN regulation of striatal DA***

441 Although synchronous CIN activation robustly triggers DA release *in vitro*, we did not find  
442 evidence that this effect is functionally important *in vivo* in the behavioral context of a reward-guided  
443 behavior: DA dynamics are sustained despite loss of Ach in the VLS, and RPE encoding remains even in  
444 the absence of Ach release throughout the entire striatum. Nevertheless, specific deletion of muscarinic  
445 and nicotinic receptors in DA neurons are necessary to reveal if Ach can regulate other aspects of DA  
446 release. Furthermore, we found that optogenetic activation of CINs, despite being able to drive large  
447 transients in Ach levels, caused only small changes DA levels *in vivo* (e.g., compared to those evoked by  
448 rewards), which contrasts with the robust DA release evoked in striatal slices<sup>32,62</sup>. One caveat is that our  
449 method may not synchronously activate a sufficient population of CINs due to the spatial constraints of  
450 opsin expression and laser excitation. The discrepancy between the ability of CINs to regulate DA release  
451 *in vitro* and *in vivo* is surprising and may stem from fundamental differences between the two  
452 experimental systems. Within a striatal slice, basal neuromodulator levels are low, whereas *in vivo* CINs  
453 and DANs are both spontaneously active and constantly modulate their activity in response to  
454 environmental cues and stimuli, which may create less permissive conditions for CINs to effectively drive  
455 DA release. Furthermore, *in vivo* CINs may be more inhibited via D2Rs, nAChRs may be more  
456 desensitized, or CIN activity may not be sufficiently synchronized across striatum. However, it remains  
457 possible that CINs can modulate DA levels to a greater extent in other *in vivo* contexts, for instance, set  
458 shifting<sup>63</sup> and reversal and extinction learning<sup>64</sup>.

459

#### 460 ***DA regulation of striatal Ach***

461 CIN pauses emerge after classical conditioning in response to salient and reward-predicting  
462 cues<sup>24</sup>, and their coincidence with and dependence on DA release support the requirement for DA to  
463 generate this pause. However, a long-standing debate remains about whether DA is responsible for CIN  
464 pauses *in vivo*. Subsequent studies found that changes in DA firing do not coincide with changes in CIN  
465 firing<sup>25</sup> and Ach pauses were partially repressed, but not eliminated, upon D2R deletion in CINs<sup>46</sup>. Other  
466 inputs have been implicated in generating these pauses, including withdrawal of cortical inputs, and  
467 excitation of thalamic neurons and GABAergic neurons from the VTA<sup>43,44,65</sup>.

468 In the 2ABT, we observe Ach dynamics that are consistent with the classical CIN pause.  
469 Importantly, we find that Ach signals are reward responsive and sensitive to RPE, which contrasts with  
470 previous studies. This difference could stem from the fact that we measured neurotransmitter levels  
471 instead of cell firing, and the former may be a more sensitive measure of changes induced by reward  
472 outcome. During a trial, we find that a subset of reductions in Ach transients cooccur with increases in DA

473 levels and, contrary to prior findings, are eliminated when D2Rs are deleted in CINs. However, not all  
474 reductions in Ach signals are DA-dependent – only those that coincide with a rise in DA release are. In  
475 fact, during unrewarded trials Ach levels dip alongside DA following side port entry and this transient is  
476 unaffected by D2R loss. Taken together, we posit that not all transient reductions in Ach levels are  
477 equivalent, and multiple mechanisms can generate them in a context-dependent manner. Some pauses  
478 are DA-dependent, such as those in rewarded trials of the 2ABT, while others may partially depend on  
479 DA<sup>46</sup> or be DA-independent. In future studies, performing these D2R-deletions selectively in CINs in  
480 adulthood using a CRISPR-based approach will complement these results and address concerns of  
481 circuit rewiring or compensation.

482

### 483 ***Extra-striatal regulation of cholinergic Ach***

484 Another long-standing debate has been the role of cortex versus thalamus on CIN activity. Some  
485 studies support the thalamus as being the dominant CIN glutamatergic input. Optogenetic studies  
486 revealed strong thalamic but negligible cortical connectivity onto CINs<sup>66</sup>, and cortical activity did not  
487 correlate with striatal CIN activity in large scale recordings of mice performing a visually guided task<sup>67</sup>. In  
488 contrast, other studies have found that both the cortex and thalamus can drive CIN activity *in vitro*<sup>68</sup> and  
489 *in vivo*<sup>69</sup>, and a rabies-based anatomical study revealed that CINs receive extensive inputs from both  
490 regions<sup>69</sup>. To address these divergent findings, we silenced each input individually using tetanus toxin.  
491 We found that loss of either cortical or thalamic transmission results in severe suppression of Ach levels  
492 and disruption of its release patterns; thus, both inputs are important modulators of CINs in the VLS. With  
493 our strategy, we cannot determine the relative contribution of each input to CIN activity because the  
494 degree of tetanus inhibition may vary due to differences in viral infectivity and toxin efficacy across cell  
495 types. Furthermore, disruption of each input affects many cells in the striatum (and in other brain regions)  
496 such that some of the effects on Ach levels may be indirect. Finally, whether both inputs play a similar  
497 role in other striatal regions and in other behavioral contexts remains to be determined. Given the spatial  
498 and functional heterogeneity of striatum, a comprehensive survey of these inputs is necessary to resolve  
499 different conclusions across past studies.

500

### 501 ***Cholinergic contributions to behavior***

502 From our study, we gained a snapshot of only a few of the multitude of complex interactions that  
503 take place in striatum. Much more remains to be understood about how neurotransmitter release is  
504 integrated across time and space to direct striatal function. It has been hypothesized that CIN pauses are  
505 time windows that allow DA to potentiate corticostriatal and thalamostriatal synapses<sup>70</sup>. Consistent with  
506 this, a precise *in vivo* coincidence of CIN pauses, DAN activation, and striatal spiny projection neuron  
507 (SPN) depolarization is required for long-term potentiation of corticostriatal synapses with SPNs<sup>71</sup>. In the  
508 2ABT, different reward outcomes yield unique patterns of neurotransmitter release, the combination of  
509 which could tune the plasticity of striatal synapses in distinct ways to drive behavior. During rewarded

510 trials, DA and Ach are tightly anticorrelated, which could permit potentiation at multiple time points. In  
511 unrewarded trials, DA and Ach release are repressed, which could in turn promote depression. With D2R  
512 loss, the temporal gating of DA by Ach is disrupted, resulting in aberrant Ach signaling that may inhibit  
513 plasticity by reducing glutamatergic transmission<sup>72</sup> and ultimately impair the ability of mice to incorporate  
514 past knowledge into current actions. In conclusion, by using a diverse toolset to interrogate and alter  
515 neurotransmitter levels during a complex behavioral task, we establish a more precise *in vivo* role for a  
516 long-defined *in vitro* circuit and reveal new modes of CIN regulation by local and long-range inputs.  
517 Moreover, our findings set the framework for further studies upon which we can gain a deeper  
518 understanding of the neurochemical basis of decision making and behavior.

519

## 520 **Methods**

521

### 522 **Mice**

523 The following mice lines were used: C57BL6/J (Jackson labs #000664); *ChAT-IRES-Cre*  
524 (Jackson labs #006410); *DAT-IRES-Cre* (Jackson labs #006660), *Drd2<sup>loxP</sup>* (Jackson labs #020631);  
525 *Vglut2-IRES-Cre* (Jackson labs #028863); *Vglut1-IRES-Cre* (Jackson labs #023527). All mice were bred  
526 on a C57BL/6J genetic background and heterozygotes were used unless noted. For behavior  
527 experiments, males at 6-8 weeks of age were used. Only males were used to avoid any behavioral  
528 variation due to the estrous cycle in female mice and because of recent findings that only male behavior  
529 is affected by loss of muscarinic Ach receptors<sup>73</sup>. All animal care and experimental manipulations were  
530 performed in accordance with protocols approved by the Harvard Standing Committee on Animal Care,  
531 following guidelines described in the US NIH Guide for the Care and Use of Laboratory Animals.

532

### 533 **Intracranial injections**

534 Mice were anesthetized with 5% isoflurane and maintained under surgery with 1.5% isoflurane  
535 and 0.08% O<sub>2</sub>. Under the stereotaxic frame (David Kopf Instruments), the skull was exposed in aseptic  
536 conditions, a small craniotomy (~300  $\mu$ m) was drilled, and the virus was injected into the following regions  
537 with the associated coordinates listed from bregma: VLS (coordinates: 0.6 mm A/P, +/-2.3 mm M/L, and  
538 3.2 mm D/V); SNc and VTA (coordinates: -3.35 mm A/P, +/- 1.75 mm M/L, and 4.3 mm D/V); thalamus  
539 (coordinates: -2.1 mm A/P, +/-1.0 mm M/L, and 3.5 mm D/V); prefrontal cortex (coordinates: 2.0 mm A/P,  
540 +/-0.4 mm M/L, and 2.3 mm D/V).

541 Injections were performed as previously described<sup>74</sup>. A pulled glass pipette was held in the brain  
542 for 3 minutes, and viruses were infused at a rate of 50 nl/min (VLS), 30-40 nl/min (PFC), and 70 nl/min  
543 (SNc/VTA) with a syringe pump (Harvard Apparatus, #883015). Pipettes were slowly withdrawn (<10  
544  $\mu$ m/s) at least 6 min after the end of the infusion. 350 nl was infused per injection site except for Ctb  
545 injections (50 nl at 4  $\mu$ g/ $\mu$ l).



546 For AAV injections, the wound was sutured. For fiber implants, following AAV injection, the skull  
547 was scored lightly with a razor blade to promote glue adhesion. Then, a 200  $\mu\text{m}$  blunt end fiber  
548 (MFC\_200/230-0.48\_4 mm, Doric Lenses) was slowly inserted into the brain until it reached 100  $\mu\text{m}$   
549 above injection site. The fiber was held in place with glue (Loctite gel #454) and hardening accelerated  
550 with application of Zip Kicker (Pacer Technology). A metal headplate was glued at lambda and white  
551 cement (Parkell) was applied on top of the glue to further secure the headplate and fibers. Fiber implants  
552 were protected with a removable plastic cap (Doric Lenses) until recordings.

553 Following the surgery, mice were placed in a cage with a heating pad until their activity was  
554 recovered before returning to their home cage. Mice were given pre- and post-operative oral carprofen  
555 (CPF, 5 mg/kg/day) as an analgesic and monitored daily for at least 4 days post-surgery. At least 4 weeks  
556 passed after virus injection before experiments were performed, except for retrograde tracer injections in  
557 which 1 week passed.

558

### 559 **Viruses**

560 The following viruses were used, with source and titer indicated in parentheses:

561 AAV2/9 hSyn-dlight1.1 (Boston's Children's hospital core (BCH); 6E12 GC/ml)

562 AAV2/9 hSyn-dlight1.1 D103A (BCH, 2.5E12 GC/ml)

563 AAV2/9 hSyn-GRAB Ach3.0 (WZ Biosciences, 6.5E12 GC/ml)

564 AAV2/9 hSyn-GRAB Ach3.0 mutant (Vigene, 1E12 GC/ml)

565 AAV 2/9 hSyn-GRAB-rDA1h (WZ Biosciences, 1.9E13 GC/ml)

566 AAV2/1 hSyn-DIO-ChrimsonR-tdTomato (UNC Vector Core, 2E12 GC/ml)

567 AAV2/8 hSyn-SIO-TelC-mCherry (Janelia Viral Core, 2.2E12 GC/ml)

568 AAV2/rg hSyn-SIO-TelC-mCherry (Janelia Viral Core, 5.5E12 GC/ml)

569 AAV2/8 hSyn-DIO-mCherry (Addgene, 2.5E13 GC/ml)

570 AAV2/rg hSyn-DIO-mCherry (Addgene, 9E12 GC/ml)

571 AAV2/1 hSyn-DIO-stGtACR2-FusionRed (Addgene, 4.2E13 GC/ml)

572 AAV2/1 hSyn-SF-iGluSnFR.A1848 (Addgene, 3E12 GC/ml)

573 AAV2/1 hSyn-DIO-NES-jRcamp1b-WPRE-SV40 (Addgene, 4.5E13 GC/ml)

574 AAV2/1 hSyn-jGCaMP8s-WPRE (Addgene, 2.8E13 GC/ml)

575 AAV2/1 hSyn-jGCaMP8m-WPRE (Addgene, 2.0E13 GC/ml)

576

### 577 **Immunohistochemistry**

578 Mice were anaesthetized by isoflurane inhalation and transcardially perfused with phosphate-  
579 buffered saline (PBS) followed by 4% paraformaldehyde (PFA) in PBS. Brains were extracted and stored  
580 in 4% PFA PBS for at least 8 hours or in 4% PFA, 0.02% sodium azide, and PBS for long term storage at  
581 4°C. Brains were sliced into 70  $\mu\text{m}$  thick free-floating sections with a Leica VT1000s vibratome. Selected  
582 slices were transferred to a six well plate and rinsed three times for 5 minutes each in PBS. They were

583 then blocked with rotation at room temperature for an hour in blocking buffer (5% normal goat serum  
584 (Abcam), 0.2% TritonX-100 PBS). Blocking buffer was removed and replaced with 500-700  $\mu$ l of a  
585 solution containing the indicated primary antibody. Slices were incubated overnight with side-to-side  
586 rotation at 4°C. The next day, slices were transferred to a clean well and washed five times, 5 minutes  
587 each in PBST (PBS with 0.2% TritonX-100). Following the final wash, slices were incubated for 1.5 hours  
588 in 500-700  $\mu$ l of the indicated secondary antibody diluted 1:500 in blocking buffer. Slices were washed  
589 four times in PBST for 5 minutes each, then four times in PBS for 5 minutes each before mounting with  
590 ProLong Diamond Antifade Mountant with DAPI (Thermo Fisher Scientific). Slices were imaged with an  
591 Olympus VS120 slide scanning microscope.

592

### 593 **Primary antibodies**

594 The following antibodies were used with the source and dilution indicated in parentheses:

595 goat anti-Choline acetyltransferase (Millipore Sigma #AB144P; 1:200)

596 mouse anti-tyrosine hydroxylase (Immunostar #22941; 1:1000)

597 chicken anti-GFP (Abcam ab13970; 1:1500)

598 rabbit anti-GFP (Novus Biologicals #NB600-308; 1:1000)

599 rabbit anti-mCherry (Takara Bio #632496; 1:1000)

600 rabbit anti-GFAP (Abcam ab7260; 1:1500)

601

### 602 **Behavior apparatus, training, and task**

603 The apparatus used for the behavior is as described previously<sup>49</sup> with the following modifications.

604 Clear acrylic barriers 5.5 cm in length were installed in between the center and side ports prior to training

605 to extend the trial time to aid in better resolved photometry recordings. Water was delivered in 3  $\mu$ l

606 increments. Hardware and software to control the behavior box is available online:

607 <https://github.com/HMS-RIC/TwoArmedBandit>

608 Mice were water restricted 1 ml per day prior to training and maintained at  $\geq$ 80% initial body

609 weight for the full duration of training and photometry. All training sessions were conducted in the dark

610 under red light conditions. A blue LED above the center port signals to the mouse to initiate a trial by

611 poking in the center port. Blue LEDs above the side ports are then activated, signaling the mouse to poke

612 in the left or right side port within 5 seconds. At any given instance, only one side port rewards water.

613 Reward probabilities are defined by custom software (MATLAB). Withdrawal from the side port ends the

614 trial and begins a 1 second intertrial interval (ITI). An expert mouse can perform 200-300 trials in a

615 session.

616 To train the mice to proficiency, they were subjected to incremental training stages. Each training

617 session lasts for 30-60 minutes, adjusted according to the mouse's performance. Mice progress to the

618 next stage once they were able to complete at least 100 successful trials with at least a 75% reward rate.

619 On the first day, they were habituated to the behavior box, with water being delivered from both side ports

620 and triggered only by a side port poke. In the next stage, mice learned the trial structure – only a poke in  
621 center port followed by a side port poke delivers water. Then, the mice transitioned to learning the block  
622 structure, in which 30 successful trials on one side port triggers a deterministically rewarded port ( $P_{\text{high}} =$   
623 100%) to switch to the other side port. Finally, mice performed trials in the presence of barriers in  
624 between the center and side ports. A series of transparent barriers of increasing size (extra-small (1.5  
625 cm), small (3 cm), medium (4 cm), and long (5.5 cm)) aided in learning. Finally, the mice were trained on  
626 probabilistic reward delivery ( $P_{\text{high}} = 95\%$ ) and subjected to fiber implantation.

627 Following fiber implant surgeries, mice were retrained to achieve the same pre-surgery  
628 performance level. Habituation to head-fixation on a wheel followed by attachment of a mock photometry  
629 patchcord was performed over successive days. Recordings were performed 4 weeks after surgery to  
630 allow for stable viral expression levels as well as a consistent and proficient level of task performance  
631 from the mice.

632

### 633 **Photometry and behavior recordings**

634 Fiber implants on the mice were connected to a 0.48 NA patchcord (Doric Lenses,  
635 MFP\_200/220/900-0.48\_2m\_FCM-MF1.25, low autofluorescence epoxy), which received excitation light  
636 and propagated its emission light to a Dorics filter cube (blue excitation light (465-480 nm); red excitation  
637 light (555-570 nm), green emission light (500-540 nm); red emission light (580-680 nm) (FMC5\_E1(465-  
638 480)\_F1(500-540)\_E2(555-570)\_F2(580-680)\_S, Doric Lenses). Excitation light originated from LED  
639 drivers (Thorlabs) and was amplitude modulated at 167 Hz (470 nm excitation light, M470F3, Thorlabs;  
640 LED driver LEDD1B, Thorlabs) and 223 Hz (565 nm excitation light, M565F3, Thorlabs, LED driver  
641 LEDD1B, Thorlabs) using MATLAB. The following excitation light powers were used for the indicated  
642 sensors: dlight1.1 (25  $\mu\text{W}$ ); Ach3.0 (25  $\mu\text{W}$ ); rDAh (45  $\mu\text{W}$ ); iGluSNFr (15  $\mu\text{W}$ ). Signals from the  
643 photodetectors were amplified in DC mode with Newport photodetectors or Dorics amplifiers and received  
644 by a Labjack (T7) streaming at 2000 Hz. The Labjack also received synchronous information about  
645 behavior events logged from the Arduino which controls the behavior box. The following events were  
646 recorded: center port entry and exit, side port entry and exit, lick onset and offset, and LED light onset  
647 and offset.

648

### 649 **Optogenetic manipulations**

650 For optogenetic stimulations with Chrimson during behavior (**Extended Data Fig. 6c**), 15 mW of  
651 590 nm laser (Optoengine) was evoked in 25% of trials interleaved throughout the session. The excitation  
652 light was delivered via the Doric filter cube, which led to a laser stimulation artifact which is removed in  
653 the recordings. Only one hemisphere was illuminated in each session. For optogenetic stimulations with  
654 Chrimson and with Jaws for DANs (**Fig. 4b and 4c**), 15 mW of 590 nm laser was used, while 0.7 mW of  
655 463 nm laser was used for stGtACR2 stimulations (**Fig. 3g**). For optogenetic stimulations of head-fixed  
656 mice on a wheel, in each session, laser excitation duration was 1.5 seconds, with a 45 second intertrial

657 interval, repeated 20 times. Signals displayed are averages of each session (**Fig. 4b and 4c, Extended**  
658 **Data Fig. 6a**). The photometry signal baseline was calculated by averaging the signal 1.5 seconds prior  
659 to laser stimulation across the 20 sweeps.

660

### 661 **Behavior performance analysis**

662 Switching behavior of mice in this task is accurately captured by a recursively formulated logistic  
663 regression model (RFLR), which depends on an influence of choice history bias ( $\alpha$ ), evidence  
664 accumulation ( $\beta$ ), and the rate of decay of action-outcome information for each trial ( $\tau$ ) to make  
665 predictions about future choice<sup>49</sup>. Based on our calculated  $\tau$ , a history length of two is sufficient to capture  
666 ~75% of the evidence weight (**Extended Data Fig. 1f**). While a history length of three would increase this  
667 evidence weight by 10%, it does so at the cost of reducing the frequency for each of the resulting  
668 sequences and limiting our power for estimation. This supports our use of conditional switch probabilities  
669 with a history length of two trials for analyses of model performance and behavioral perturbations.

670 Because we do not know the underlying distribution of our behavioral data, we developed a non-  
671 parametric test to determine statistical significance between the experimental and control datasets. We  
672 bootstrapped from our original datasets by resampling 1000 times. After each resampling iteration, we  
673 calculated the difference ( $\Delta$ ) between the experimental and control groups of the parameter of interest  
674 (i.e. RFLR coefficients, reward rate, etc.). This generated a distribution of possible  $\Delta$ s, from which we  
675 calculated a 95% confidence interval. If the confidence interval of the  $\Delta$ s did not overlap with zero, which  
676 is our null hypothesis, it was annotated as significant.

677

### 678 **Analysis of photometry data**

#### 679 *Signal demodulation*

680 The frequency modulated signals were detrended using a rolling Z-score with a time window of 1  
681 minute (12000 samples). As the ligand-dependent changes in fluorescence measured *in vivo* are small  
682 (few %) and the frequency modulation is large (~100%), the variance in the frequency modulated signal is  
683 largely ligand independent. In addition, the trial structure is rapid with inter-trial intervals of < 3 sec.  
684 Thus, Z-scoring on a large time window eliminates photobleaching without affecting signal. Detrended,  
685 frequency modulated signals were frequency demodulated by calculating a spectrogram with 1 Hz steps  
686 centered on the signal carrier frequency using the MATLAB 'spectrogram' function. The spectrogram was  
687 calculated in windows of 216 samples with 108 sample overlap, corresponding to a final sampling period  
688 of 54 ms. The demodulated signal was calculated as the power averaged across an 8 Hz frequency band  
689 centered on the carrier frequency. No additional low-pass filtering was used beyond that introduced by  
690 the spectrogram windowing. For quantification of fluorescence transients as Z-scores, the demodulated  
691 signal was passed through an additional rolling Z-score (1 min window). In select analyses, (cross-

692 correlation in **Fig. 2d**), the same approach was used but with 72 sample windows with 36 sample overlap  
693 in the spectrogram to yield a 18 ms final data sample period.

694 To synchronize photometry recordings with behavior data, center port entry timestamps from the  
695 Arduino were aligned with the digital data stream indicating times of center-port entries. Based on this  
696 alignment, all other port and lick timings were aligned and used to calculate the trial-type averaged data  
697 shown in all figures. The Z-scored fluorescence signals were averaged across trials, sessions, and mice  
698 with no additional data normalization.

#### 699 *Cross-variance analyses*

700 Cross-correlation analysis was performed in two ways. First, for cross-correlations with the  
701 assumption of semi-wide signals (i.e. as a function of a single variable representing the time shift between  
702 two signals), the 'xcorr' function in Matlab was used on normalized data and with the "normalized" option  
703 set to yield cross-covariance values between -1 and 1, indicating perfect anti-correlation and correlation,  
704 respectively. For the continuous demodulated fluorescence, signals were used as input. Shuffling was  
705 accomplished by cross-correlating signals across sessions which were truncated to the duration of the  
706 shortest signal. For cross-correlation with segregation by trial types, 40 data points before and 60 data  
707 points after the event of interest (e.g., center port entry time in all of the cross-correlations shown) were  
708 concatenated for all trials of interest (e.g. rewarded trials) in one session and normalized using the xcorr  
709 function in MATLAB as above. For noise correlations, the trials-average signal was subtracted trial-by-  
710 trial and the residuals were concatenated and treated as above.

711 Second, for calculation of the two-dimensional cross-covariance (i.e. with no semi-wide  
712 assumption), the residual signals following subtraction of the trial-averaged signals were used to calculate  
713 the following:

$$714 \quad K(t_1, t_2) = \frac{1}{n} \sum_{i=1}^n (f_1^i - \langle f_1(t_1) \rangle) (f_2^i - \langle f_2(t_2) \rangle)$$

715 with  $i$  indicating the trial number (from 1 to  $n$ ) and  $f_1$  and  $f_2$  corresponding to the two signals  
716 analyzed. This corresponds to, for each value of  $t_1$  and  $t_2$ , calculating the mean value of the product of  
717 the residuals of each signal (relative to its trial-averaged mean) at the corresponding time points.

718

#### 719 **General linear model (GLM)**

720 Photometry recordings and behavioral data used for GLMs were collected from the indicated  
721 number of mice (see figure legends), with 3-6 sessions per mouse and 150-300 trials per session, of

722 which typically >75% are rewarded. This data was aligned to behavioral events (see *Signal demodulation*)  
723 and combined into two time-aligned matrices: a predictive matrix  $X \in \mathbb{R}^{N \times F}$ , and an associated response  
724 vector,  $y \in \mathbb{R}^N$ , where  $N$  represents the number of timesteps recorded in the session and  $F$  represents the  
725 number of predictive variables used in the analysis. For GLM analyses that included behavioral predictive  
726 variables but excluded photometry signals in the predictive matrix,  $X \in \{0, 1\}^{N \times F}$  as each entry simply  
727 indicated if a behavioral event (e.g., a lick) occurred in the time bin.

728 For each predictive matrix, a design matrix  $\phi(X) \in \mathbb{R}^{N \times F(2T+1)}$  was constructed to include  $T$  time  
729 shifts forward and backward ( $T = 20$ , 54 ms each), such that the fitting of a standard GLM generated a set  
730 of coefficients that comprise the time-dependent kernels for each of the predictive features in  $X$ . Some of  
731 these time shifts are absent in the first and last  $T$  timesteps of each session; thus, those associated  $2T$   
732 data points were excluded, and  $N$  was reduced by  $2T$ . To avoid truncation of the center port entry and  
733 side port exit kernels, trial boundaries were redefined as  $T$  timesteps prior to the center port entry and  $T$   
734 timesteps after side port exit. Thus, only data starting shortly before the trial start and after the trial end  
735 were modeled (i.e., excluding data from the intertrial interval (ITI) period in which there are no-task  
736 relevant behavioral events). For trials where the initial and final time shift spanned the boundary between  
737 two trials, the overlapped data was duplicated and included in both trials on either side of the boundary to  
738 ensure sufficient representation in training, validation, and test datasets. Because of this and the  
739 variability in the ITIs, between ~1.5% and ~17.3% of the datapoints used to fit and evaluate the models  
740 were present in both the training and test datasets. Finally, the design matrices and response vectors  
741 relevant for each given analysis were concatenated row-wise to generate the versions used to fit the GLM  
742 models.

743 To evaluate the performance of the Ordinary Least Squares (OLS) models, trials were partitioned  
744 into training and test datasets, each containing 50% of the data. For the results shown in **Extended Data**  
745 **Fig. 3b** and **Extended Data Fig. 4c**, multiple model runs were carried out, with the number of repetitions  
746 designated  $Y$  in this paragraph. For each run, the data were split into training and test datasets and held  
747 constant for all the models tested in that run.  $Y=10$  for the leave-out analysis (**Extended Data Fig. 3e**)  
748 and  $Y=3$  for the hyperparameter analysis (**Extended Data Fig. 3b**, **Extended Data Fig. 4c**). For each  
749 model run, a 10-fold Group Shuffle Split (GSS) by trial was applied to the training set to obtain ranges for  
750 the mean squared errors (MSE), based on an 80-20 training-validation split within each of the 10 GSS  
751 folds. Each validation MSE value in the boxplots (**Extended Data Fig. 3c and 3d**, **Extended Data Fig. 4a**  
752 **and 4b**) is the average squared sum of the residuals across all validation datapoints in these 10 GSS  
753 folds. Finally, the model was refit to and evaluated on the entire training dataset, and this refit model was  
754 in turn evaluated on the test dataset, resulting in the MSEs and  $R^2$  values for each model run. The  $R^2$   
755 values presented in the text are the average values calculated from the test sets averaged across  $Y$   
756 model runs. Typically, these values had small variance, with ranges from maximum to minimum of <1.2%  
757 percentage points. Therefore, the ranges are not stated in the text.

758 For each of the Least Squares Regression models used, the algorithms minimize a cost function  
759 with respect to the fitted coefficients. The cost functions are as follows, where  $J$  is the cost function to be  
760 minimized,  $X$  is the design matrix,  $y$  is the response vector,  $\beta$  is the set of fitted coefficients,  $\|a\|_2^2$  is the  
761 sum of the squared entries in vector  $a$ ,  $\|a\|_1$  is the sum of the absolute values of the entries in vector  $a$ ,  
762 and  $\lambda$  is the L1 ratio.

763 OLS:

$$764 J(X, y) = \|y - X\beta\|_2^2$$

765

766 Ridge Regression (L2):

$$767 J(X, y) = \|y - X\beta\|_2^2 + \alpha \|y - X\beta\|_2^2$$

768

769 Elastic Net / Lasso Regression (L1):

$$770 J(X, y) = \frac{1}{2N} \|y - X\beta\|_2^2 + \alpha(\lambda \|\beta\|_1 + \frac{1}{2}(1 - \lambda) \|y - X\beta\|_2^2)$$

771

772 Note that for OLS,  $\alpha = 0$  as there is no regularization. Furthermore, setting  $\lambda=1$  yields Lasso  
773 Regression (L1 Regularization). However, setting  $\lambda=0$  does not give an equation equivalent to the version  
774 of Ridge Regression provided above. Instead, the residual term is divided by a factor of  $\frac{1}{2N}$  relative to the  
775 Ridge Regression model described above resulting two different  $\alpha$  scales (**Extended Fig. 3b** and  
776 **Extended Fig. 4c**). Additionally, for L2 Regularization, the validation-based models were fit to 80% of the  
777 total of samples available to the final model; thus, the validation models performed worse than their  
778 training or test counterparts because they are, in effect, facing an increased amount of regularization.

779 The sources for the Least Squares Regression models are listed below:

780 OLS: [https://scikitlearn.org/stable/modules/generated/sklearn.linear\\_model.LinearRegression.html](https://scikitlearn.org/stable/modules/generated/sklearn.linear_model.LinearRegression.html)

781 L2: [https://scikit-learn.org/stable/modules/generated/sklearn.linear\\_model.Ridge.html](https://scikit-learn.org/stable/modules/generated/sklearn.linear_model.Ridge.html)

782 L1 & Elastic Net: [https://scikit-learn.org/stable/modules/generated/sklearn.linear\\_model.ElasticNet.html](https://scikit-learn.org/stable/modules/generated/sklearn.linear_model.ElasticNet.html)

783 All kernels ( $\beta$  coefficients) depicted are the mean coefficients across the  $Y$  model runs with the  
784 standard error of the mean represented in the shaded regions. All GLM reconstructions depict the  
785 average signal with an overlay of the bootstrapped 95% confidence intervals of the upper and lower  
786 bounds (shaded region).

787

### 788 Acute brain slice preparation

789 Brain slices were obtained from 2- to 4-month-old mice (both male and female) using standard  
790 techniques. Mice were anaesthetized by isoflurane inhalation and perfused cardiacly with ice-cold ACSF  
791 containing (in mM) 125 NaCl, 2.5 KCl, 25 NaHCO<sub>3</sub>, 2 CaCl<sub>2</sub>, 1 MgCl<sub>2</sub>, 1.25 NaH<sub>2</sub>PO<sub>4</sub>, and 25 glucose  
792 (295 mOsm kg<sup>-1</sup>). Brains were blocked and transferred into a slicing chamber containing ice-cold ACSF.  
793 Sagittal slices of striatum for amperometric or cell attached recordings were cut at 300  $\mu$ m thickness with

794 a Leica VT1000 s vibratome in ice-cold ACSF, transferred for 10 min to a holding chamber containing  
795 choline-based solution (consisting of (in mM): 110 choline chloride, 25 NaHCO<sub>3</sub>, 2.5 KCl, 7 MgCl<sub>2</sub>, 0.5  
796 CaCl<sub>2</sub>, 1.25 NaH<sub>2</sub>PO<sub>4</sub>, 25 glucose, 11.6 ascorbic acid, and 3.1 pyruvic acid) at 34°C then transferred to a  
797 secondary holding chamber containing ACSF at 34C for 10 min and subsequently maintained at room  
798 temperature (20–22°C) until use. All recordings were obtained within 4 hours of slicing. Both choline  
799 solution and ACSF were constantly bubbled with 95% O<sub>2</sub>/5% CO<sub>2</sub>.

800

### 801 **Cell-attached recordings**

802 Acute sagittal brain slices and electrophysiological recordings were obtained from the dorsal  
803 striatum as described before<sup>75</sup>, with the following variations: cholinergic interneurons were identified using  
804 morphological and electrophysiological features<sup>22</sup>. Slices were sustained in ACSF with 10 μM of  
805 gabazine, CPP, and NBQX (Tocris). For cell-attached recordings, bath temperature were maintained at  
806 34C, pipettes were filled with ACSF, had 1-2MΩ resistance, seal resistances were from 10 to 100MΩ.  
807 Action potential firing was monitored in the cell-attached recording configuration in the voltage-clamp  
808 mode ( $V_{\text{hold}} = 0$  mV). ChR2 was activated by a single 2 ms pulse of 473 nm light delivered at 5.74 mW  
809 using full-field illumination through the objective at 120 second intervals.

810

811

### 812 **Amperometry recordings**

813 Slices were stimulated with 593 nm light, delivered at 5.86 mW for 2 ms using full-field  
814 illumination through the objective at 180 second intervals. Constant-potential amperometry was  
815 performed as previously described<sup>75</sup>. Briefly, glass-encased carbon-fiber microelectrodes (CFE1011 from  
816 Kation scientific - 7 μm diameter, 100 μm length) were placed approximately 50–100 μm within dorsal  
817 striatum slices and held at a constant voltage of + 600 mV for 9 second vs. Ag/AgCl by a Multiclamp 700B  
818 amplifier (Molecular Devices). Electrodes were calibrated with fresh 5 μM dopamine standards in ACSF to  
819 determine CFE sensitivity and to allow conversion of current amplitude to extracellular dopamine  
820 concentration.

821

### 822 **Acknowledgements**

823 We thank all members of the Sabatini lab for helpful experimental suggestions and advice, in  
824 particular M.L. Wallace and S.J. Lee. We thank P. Capelli, A.E. Girasole, and C.S. Smillie for feedback on  
825 the manuscript. We also thank G. Radeljic for technical assistance and Yulong Li for generously sharing  
826 the rDAh sensor. We are deeply grateful to Ofer Mazor and Pavel Gorelick at the Harvard Medical School  
827 Research Instrumentation Core Facility for their help with implementing the hardware and software for the  
828 2ABT. This work was supported by grants to B.L.S (R37-NS046579, U19 NS113201, and Simons Center  
829 for the Global Brain), to L.C. (Hanna Gray Fellowship from the Howard Hughes Medical Institute), and to  
830 C.C.B. (NSF Graduate Research Fellowship Program).

831



832 **Author contributions**

833 L.C. and B.L.S. conceptualized the study. L.C. and B.L.S. wrote and edited the manuscript, with  
834 feedback from C.C.B. and J.A.Z. L.C. and M.J.W. performed experiments except electrophysiological  
835 ones, which were done by W.W. B.L.S. developed the photometry analysis pipeline, and C.C.B.  
836 established the behavioral analysis pipeline. J.A.Z. and B.L.S conceptualized and implemented the  
837 GLMs.

838

839 **Competing interests**

840 The authors declare no competing interests.

841

842 **Data and code availability**

843 The data and code that supports the findings of this study are available upon request from the  
844 corresponding author.

845

846 **References**

- 847 1. Graybiel, A., Aosaki, T., Flaherty, A. & Kimura, M. The basal ganglia and adaptive motor control.  
848 *Science (80-. )*. **265**, 1826–1831 (1994).
- 849 2. Roseberry, T. K. *et al.* Cell-Type-Specific Control of Brainstem Locomotor Circuits by Basal  
850 Ganglia. *Cell* **164**, 526–537 (2016).
- 851 3. Alexander, G. E. & Crutcher, M. D. Functional architecture of basal ganglia circuits: neural  
852 substrates of parallel processing. *Trends Neurosci.* **13**, 266–271 (1990).
- 853 4. Kreitzer, A. C. & Malenka, R. C. Striatal Plasticity and Basal Ganglia Circuit Function. *Neuron* **60**,  
854 543–554 (2008).
- 855 5. Bolam, J. P., Hanley, J. J., Booth, P. A. C. & Bevan, M. D. Synaptic organisation of the basal  
856 ganglia. *J. Anat.* **196**, 527–542 (2000).
- 857 6. Kincaid, A. E., Zheng, T. & Wilson, C. J. Connectivity and convergence of single corticostriatal  
858 axons. *J. Neurosci.* **18**, 4722–4731 (1998).
- 859 7. Smith, Y., Bennett, B. D., Bolam, J. P., Parent, A. & Sadikot, A. F. Synaptic relationships between  
860 dopaminergic afferents and cortical or thalamic input in the sensorimotor territory of the striatum in  
861 monkey. *J. Comp. Neurol.* **344**, 1–19 (1994).
- 862 8. Beckstead, R. M., Domesick, V. B. & Nauta, W. J. H. Efferent connections of the substantia nigra  
863 and ventral tegmental area in the rat. *Brain Res.* **175**, 191–217 (1979).
- 864 9. Swanson, L. W. The projections of the ventral tegmental area and adjacent regions: A combined  
865 fluorescent retrograde tracer and immunofluorescence study in the rat. *Brain Res. Bull.* **9**, 321–  
866 353 (1982).
- 867 10. Beier, K. T. *et al.* Circuit Architecture of VTA Dopamine Neurons Revealed by Systematic Input-  
868 Output Mapping. *Cell* **162**, 622–634 (2015).

- 869 11. Poulin, J. F. *et al.* Mapping projections of molecularly defined dopamine neuron subtypes using  
870 intersectional genetic approaches. *Nat. Neurosci.* **21**, 1260–1271 (2018).
- 871 12. Schultz, W. Predictive Reward Signal of Dopamine Neurons. **40**, (1998).
- 872 13. Schultz, W., Dayan, P. & Montague, P. R. A neural substrate of prediction and reward. *Science*  
873 (80- ). **275**, 1593–1599 (1997).
- 874 14. Reynolds, J. N. J. & Wickens, J. R. Dopamine-dependent plasticity of corticostriatal synapses.  
875 *Neural Networks* **15**, 507–521 (2002).
- 876 15. Reynolds JNJ, Hyland BI & Wickens JR. A cellular mechanism of reward-related learning. *Nature*  
877 **413**, 67–70 (2001).
- 878 16. Fisher, S. D. *et al.* Reinforcement determines the timing dependence of corticostriatal synaptic  
879 plasticity in vivo. *Nat. Commun.* **8**, (2017).
- 880 17. Kravitz, A. V. *et al.* Regulation of parkinsonian motor behaviours by optogenetic control of basal  
881 ganglia circuitry. *Nature* **466**, 622–626 (2010).
- 882 18. Albin, R. L., Young Anne B. & Penney, J. B. The functional anatomy of basal ganglia disorders.  
883 *Trends Neurosci.* **12**, 366–375 (1989).
- 884 19. DeLong, M. R. Primate models of movement disorders of basal ganglia origin. *Trends Neurosci.*  
885 **13**, 281–285 (1990).
- 886 20. Hebb, C. O. & Silver, A. Gradient of Cholinesterase Activity and of Choline Acetylase Activity in  
887 Nerve Fibres : Gradient of Choline Acetylase Activity. *Nature* **189**, 123–125 (1961).
- 888 21. Macintosh, F. C. The distribution of acetylcholine in the peripheral and the central nervous system.  
889 *J. Physiol.* **99**, 436–442 (1941).
- 890 22. Bolam, J. P., Wainer, B. H. & Smith, A. D. Characterization of cholinergic neurons in the rat  
891 neostriatum. A combination of choline acetyltransferase immunocytochemistry, Golgi-impregnation  
892 and electron microscopy. *Neuroscience* **12**, 711–718 (1984).
- 893 23. Aosaki, T. *et al.* Responses of tonically active neurons in the primate's striatum undergo  
894 systematic changes during behavioral sensorimotor conditioning. *J. Neurosci.* **14**, 3969–3984  
895 (1994).
- 896 24. Aosaki, T., Graybiel, A. & Kimura, M. Effect of the Nigrostriatal Dopamine System on Acquired  
897 Neural Responses in the Striatum of Behaving Monkeys. *Science (80- ).* **265**, 412–415 (1994).
- 898 25. Morris, G., Arkadir, D., Nevet, A., Vaadia, E. & Bergman, H. Coincident but distinct messages of  
899 midbrain dopamine and striatal tonically active neurons. *Neuron* **43**, 133–143 (2004).
- 900 26. Kimura, M., Rajkowski, J. & Evarts, E. Tonicly discharging putamen neurons exhibit set-  
901 dependent responses. *Neurobiology* **81**, 4998–5001 (1984).
- 902 27. Apicella, P., Ravel, S., Deffains, M. & Legallet, E. The Role of Striatal Tonicly Active Neurons in  
903 Reward Prediction Error Signaling during Instrumental Task Performance. **31**, 1507–1515 (2011).
- 904 28. Ravel, S., Legallet, E. & Apicella, P. Tonicly active neurons in the monkey striatum do not  
905 preferentially respond to appetitive stimuli. *Exp. Brain Res.* **128**, 531–534 (1999).

- 906 29. Lee, J., Finkelstein, J., Choi, J. Y. Y. & Witten, I. B. B. Linking Cholinergic Interneurons, Synaptic  
907 Plasticity, and Behavior during the Extinction of a Cocaine-Context Association. *Neuron* **90**, 1071–  
908 1085 (2016).
- 909 30. Barbeau, A. The Pathogenesis of Parkinson ' s Disease : A New Hypothesis. *Canad. Med. Ass. J.*  
910 **87**, 802–807 (1962).
- 911 31. McGeer, P. L., Boulding, J. E., Gibson, W. C. & Foulkes, R. Drug-induced extrapyramidal  
912 reactions. *J. Paediatr. Child Health* **38**, 95–97 (2002).
- 913 32. Threlfell, S. *et al.* Striatal Dopamine Release Is Triggered by Synchronized Activity in Cholinergic  
914 Interneurons. *Neuron* **2**, 58–64 (2012).
- 915 33. Kramer, P. F. *et al.* Synaptic-like axo-axonal transmission from striatal cholinergic interneurons  
916 onto dopaminergic fibers. *Neuron* (2022). doi:10.1016/J.NEURON.2022.07.011
- 917 34. Cachope, R. *et al.* Selective activation of cholinergic interneurons enhances accumbal phasic  
918 dopamine release: Setting the tone for reward processing. *Cell Rep.* **2**, 33–41 (2012).
- 919 35. Liu, C. *et al.* An action potential initiation mechanism in distal axons for the control of dopamine  
920 release. *Science (80-. )*. **375**, 1378–1385 (2022).
- 921 36. Straub, C., Tritsch, N. X., Hagan, N. A., Gu, C. & Sabatini, B. L. Multiphasic modulation of  
922 cholinergic interneurons by nigrostriatal afferents. *J. Neurosci.* **34**, 8557–8569 (2014).
- 923 37. Chuhma, N., Mingote, S., Moore, H. & Rayport, S. Dopamine neurons control striatal cholinergic  
924 neurons via regionally heterogeneous dopamine and glutamate signaling. *Neuron* **81**, 901–912  
925 (2014).
- 926 38. Wieland, S. *et al.* Phasic Dopaminergic Activity Exerts Fast Control of Cholinergic Interneuron  
927 Firing via Sequential NMDA , D2 , and D1 Receptor Activation. **34**, 11549–11559 (2014).
- 928 39. Mamaligas, A. A., Cai, Y. & Ford, C. P. Nicotinic and opioid receptor regulation of striatal  
929 dopamine D2-receptor mediated transmission. *Sci. Rep.* **6**, 1–11 (2016).
- 930 40. Mohebi, A. *et al.* Dissociable dopamine dynamics for learning and motivation. *Nature* **570**, 65–70  
931 (2019).
- 932 41. Azcorra, M. *et al.* Dopaminergic axons track somatic signaling in behaving mice. *bioRxiv*  
933 2022.06.20.496872 (2022).
- 934 42. Lee, S. J. *et al.* Cell-type-specific asynchronous modulation of PKA by dopamine in learning.  
935 *Nature* (2020). doi:10.1038/s41586-020-03050-5
- 936 43. Zhang, Y. *et al.* Pauses in Cholinergic Interneuron Activity Are Driven by Excitatory Input and  
937 Delayed Rectification , with Dopamine Modulation Report Pauses in Cholinergic Interneuron  
938 Activity Are Driven by Excitatory Input and Delayed Rectification , with Dopamine Modul. *Neuron*  
939 **98**, 918-925.e3 (2018).
- 940 44. Ding, J. B., Guzman, J. N., Peterson, J. D., Goldberg, J. A. & Surmeier, D. J. Thalamic gating of  
941 corticostriatal signaling by cholinergic interneurons. *Neuron* **67**, 294–307 (2010).
- 942 45. Al-Hasani, R. *et al.* Ventral tegmental area GABAergic inhibition of cholinergic interneurons in the

- 943 ventral nucleus accumbens shell promotes reward reinforcement. *Nat. Neurosci.* **24**, 1414–1428  
944 (2021).
- 945 46. Martyniuk, K. M. *et al.* Dopamine D2Rs Coordinate Cue-Evoked Changes in Striatal Acetylcholine  
946 Levels. *Elife* (2022).
- 947 47. Tai, L., Lee, A. M., Benavidez, N., Bonci, A. & Wilbrecht, L. Transient stimulation of distinct  
948 subpopulations of striatal neurons mimics changes in action value. **15**, (2012).
- 949 48. Donahue, C. H., Liu, M. & Kreitzer, A. C. Distinct value encoding in striatal direct and indirect  
950 pathways during adaptive learning. **7**, 44–68 (2018).
- 951 49. Beron, C. C., Neufeld, S. Q., Linderman, S. W. & Sabatini, B. L. Mice exhibit stochastic and  
952 efficient action switching during probabilistic decision making. *Proc. Natl. Acad. Sci. U. S. A.* **119**,  
953 1–12 (2022).
- 954 50. Yartsev, M. M., Hanks, T. D., Yoon, A. M. & Brody, C. D. Causal contribution and dynamical  
955 encoding in the striatum during evidence accumulation. *Elife* **7**, (2018).
- 956 51. Brunton, B. W., Botvinick, M. M. & Brody, C. D. Rats and humans can optimally accumulate  
957 evidence for decision-making. *Science (80-. )*. **340**, 95–98 (2013).
- 958 52. Patriarchi, T. *et al.* Ultrafast neuronal imaging of dopamine dynamics with designed genetically  
959 encoded sensors. *Science (80-. )*. **360**, (2018).
- 960 53. Jing, M. *et al.* A genetically encoded fluorescent acetylcholine indicator for in vitro and in vivo  
961 studies. (2019). doi:10.1038/nbt.4184
- 962 54. Lee, J. & Sabatini, B. L. Striatal indirect pathway mediates exploration via collicular competition.  
963 *Nature* **599**, 645–649 (2021).
- 964 55. Sun, F. *et al.* Next-generation GRAB sensors for monitoring dopaminergic activity in vivo. *Nat.*  
965 *Methods* **17**, 1156–1166 (2020).
- 966 56. Klapoetke, N. C. *et al.* Independent optical excitation of distinct neural populations. *Nat. Methods*  
967 **11**, 338–346 (2014).
- 968 57. Chuong, A. S. *et al.* Noninvasive optical inhibition with a red-shifted microbial rhodopsin. *Nat.*  
969 *Neurosci.* **17**, 1123–1129 (2014).
- 970 58. Bello, E. P. *et al.* Inducible ablation of dopamine D2 receptors in adult mice impairs locomotion,  
971 motor skill learning and leads to severe parkinsonism. *Mol. Psychiatry* **22**, 595–604 (2017).
- 972 59. Doig, N. M., Magill, P. J., Apicella, P., Bolam, J. P. & Sharott, A. Cortical and thalamic excitation  
973 mediate the multiphasic responses of striatal cholinergic interneurons to motivationally salient  
974 stimuli. *J. Neurosci.* **34**, 3101–3117 (2014).
- 975 60. Marvin, J. S. *et al.* Stability, affinity, and chromatic variants of the glutamate sensor iGluSnFR. *Nat.*  
976 *Methods* **15**, 936–939 (2018).
- 977 61. Dana, H. *et al.* Sensitive red protein calcium indicators for imaging neural activity. **2**, 1–24 (2016).
- 978 62. Cachepe, R. *et al.* Selective Activation of Cholinergic Interneurons Enhances Accumbal Phasic  
979 Dopamine Release : Setting the Tone for Reward Processing. *CELREP* **2**, 33–41 (2012).

- 980 63. Aoki, S., Liu, X. A. W., Zucca, A., Zucca, S. & Wickens, J. R. Role of Striatal Cholinergic  
981 Interneurons in Set-Shifting in the Rat. **35**, 9424–9431 (2015).
- 982 64. Okada, K. *et al.* Enhanced flexibility of place discrimination learning by targeting striatal cholinergic  
983 interneurons. (2014). doi:10.1038/ncomms4778
- 984 65. Brown, M. T. C. *et al.* Ventral tegmental area GABA projections pause accumbal cholinergic  
985 interneurons to enhance associative learning. *Nature* **492**, 452–456 (2012).
- 986 66. Johansson, Y. & Silberberg, G. The Functional Organization of Cortical and Thalamic Inputs onto  
987 Five Types of Striatal Neurons Is Determined by Source and Target Cell Identities Article The  
988 Functional Organization of Cortical and Thalamic Inputs onto Five Types of Striatal Neurons Is D.  
989 *Cell Rep.* **30**, 1178-1194.e3 (2020).
- 990 67. Peters, A. J., Fabre, J. M. J., Steinmetz, N. A., Harris, K. D. & Carandini, M. Striatal activity  
991 topographically reflects cortical activity. *Nature* **591**, (2021).
- 992 68. Kosillo, P., Zhang, Y.-F., Threlfell, S. & Cragg, S. J. Cortical Control of Striatal Dopamine  
993 Transmission via Striatal Cholinergic Interneurons. *Cereb. Cortex* **26**, 4160–4169 (2016).
- 994 69. Guo, Q. *et al.* Whole-brain mapping of inputs to projection neurons and cholinergic interneurons in  
995 the dorsal striatum. *PLoS One* **10**, 1–15 (2015).
- 996 70. Cragg, S. J. Meaningful silences: How dopamine listens to the ACh pause. *Trends Neurosci.* **29**,  
997 125–131 (2006).
- 998 71. Reynolds, J. N. J. *et al.* Coincidence of cholinergic pauses, dopaminergic activation and  
999 depolarisation of spiny projection neurons drives synaptic plasticity in the striatum. *Nat. Commun.*  
1000 **13**, (2022).
- 1001 72. Pakhotin, P. & Bracci, E. Cholinergic Interneurons Control the Excitatory Input to the Striatum. **27**,  
1002 391–400 (2007).
- 1003 73. Razidlo, J. A. *et al.* Chronic loss of muscarinic M5 receptor function manifests disparate  
1004 impairments in exploratory behavior in male and female mice despite common dopamine  
1005 regulation. *J. Neurosci.* JN-RM-1424-21 (2022). doi:10.1523/JNEUROSCI.1424-21.2022
- 1006 74. Huang, K. W. *et al.* Molecular and anatomical organization of the dorsal raphe nucleus. *Elife* **8**, 1–  
1007 34 (2019).
- 1008 75. Tritsch, N. X., Ding, J. B. & Sabatini, B. L. Dopaminergic neurons inhibit striatal output through  
1009 non-canonical release of GABA. *Nature* **490**, 262–266 (2012).

1010

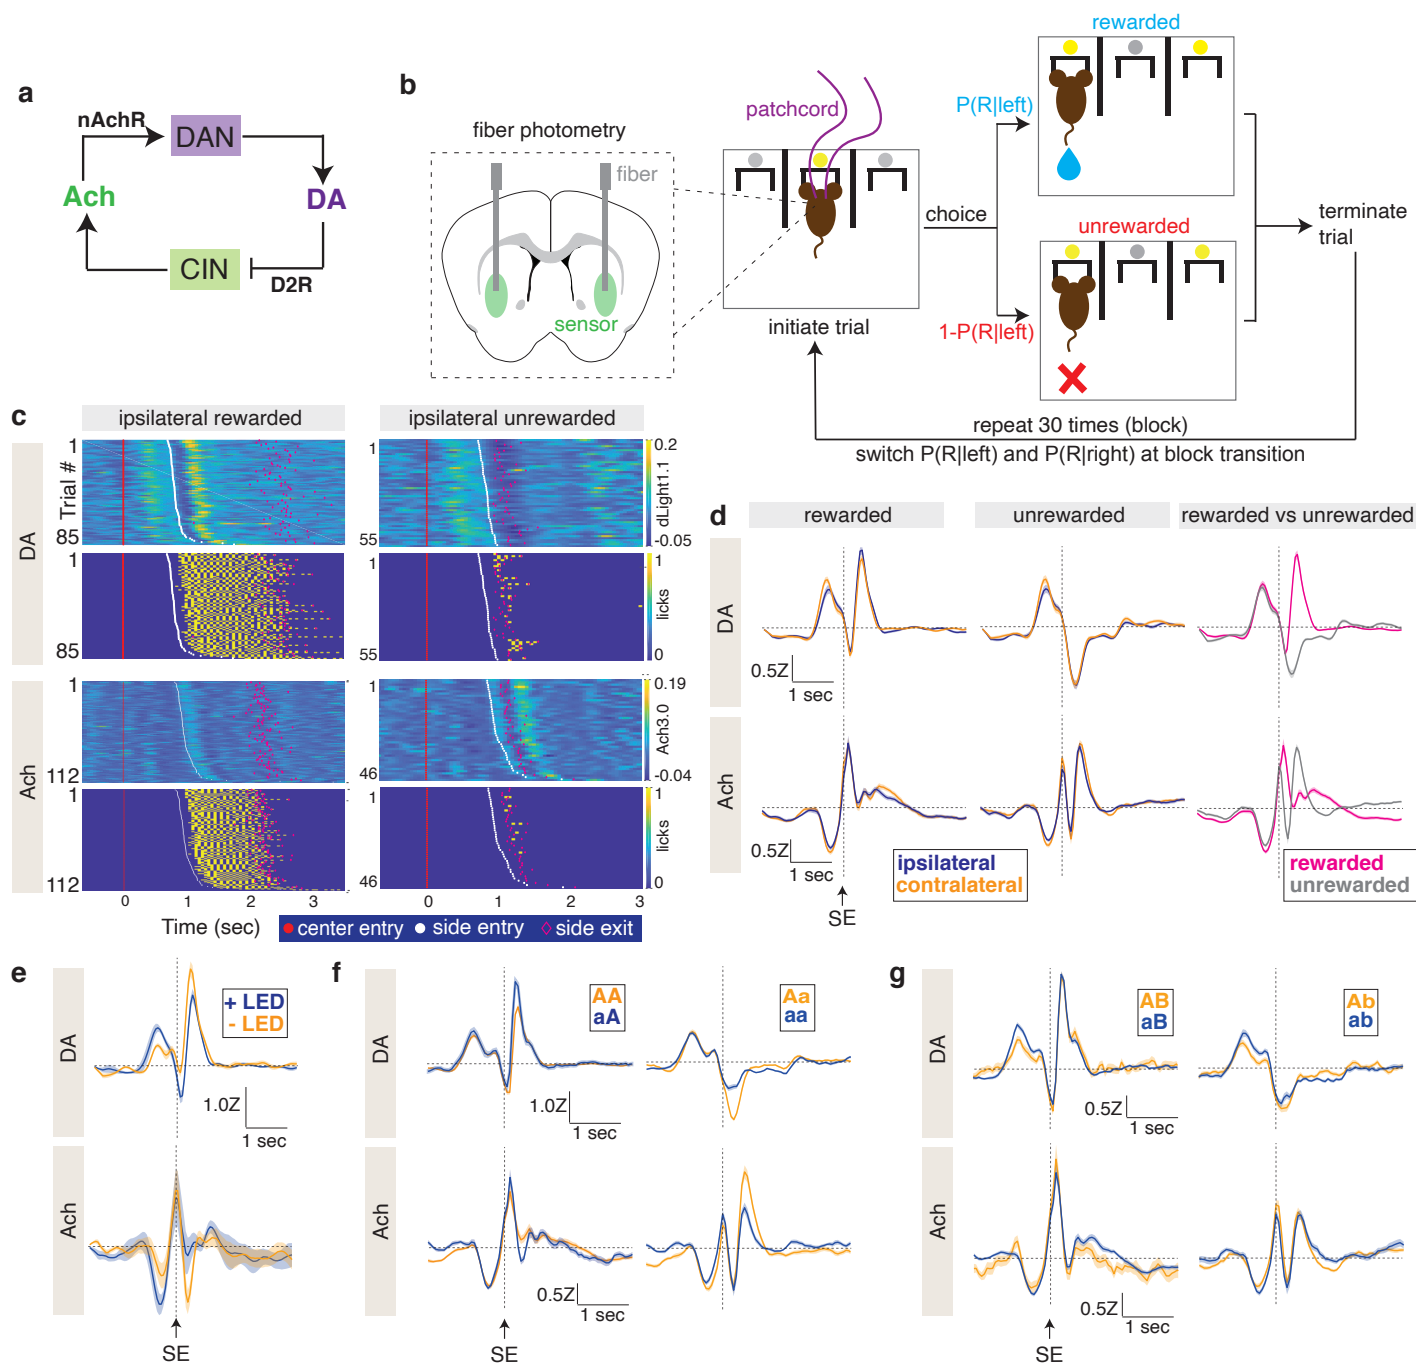

**Fig. 1 | Multiphasic dynamics of dopamine and acetylcholine in the VLS during reward-based decision making**

- a.** Schematic of proposed interactions between dopamine and acetylcholine within the striatum. Cholinergic cells (CINs) release acetylcholine (Ach), which can evoke dopamine (DA) release via nicotinic acetylcholine receptors (nAChR) expressed on dopamine neuron (DAN) terminals. Conversely, DA inhibits CINs via dopamine type 2 receptors (D2Rs).
- b.** Schematic of the 2ABT. An LED (yellow circle) above the center port cues the mouse that a trial can be initiated. Following a center port poke to initiate a trial, the mouse makes a choice to go to the left or right port. The reward probability is different for each port and used to probabilistically deliver reward to the side-port chosen by the mouse. The trial is terminated when the mouse exits the side port such that only one port can deliver reward per trial. Fiber photometry recordings are performed continuously during the task from the ventrolateral striatum of mice expressing a fluorescent sensor (left dashed inset).
- c.** Ipsilateral DA (dLight1.1) and Ach (Ach3.0) dynamics (color table) and associated licks (yellow) recorded from an example mouse during a 2ABT session. Each row shows data from an individual trial aligned to center entry (red dots), sorted by increasing side port entry time (white dots), and with side port exit time denoted (pink diamonds).

- d.** DA and Ach release in ipsilateral and contralateral trials (left and middle), as well as for rewarded and unrewarded trials in which ipsilateral and contralateral trials are combined (right). The averaged Z scored sensor signal for the indicated trial type (bold line) is depicted with the standard error of the mean (SEM) (shaded region). Data are aligned to side port entry (SE) (DA: n = 7 mice; Ach: n = 9 mice).
- e.** DA and Ach release during rewarded and unrewarded trials with omission of the LED cue during the 2ABT. Data is depicted as in **(d)** (n = 4 mice).
- f.** DA and Ach release for trials in which the mice choose the same side in both the current and previous trials, segregated by the indicated choice and reward outcome histories. 'A' indicates a rewarded trial and 'a' indicates an unrewarded trial. Data are depicted as in **(d)** (DA: n = 7 mice; Ach: n = 9 mice).
- g.** DA and Ach release for trials in which the mice choose the opposite side as the previous trial, segregated by the indicated choice and reward outcome histories. 'B' and 'b' are rewarded and unrewarded trials, respectively, performed on the side opposite to that of 'A' and 'a'. Data are depicted as in **(d)** (DA: n = 7 mice; Ach: n = 9 mice).

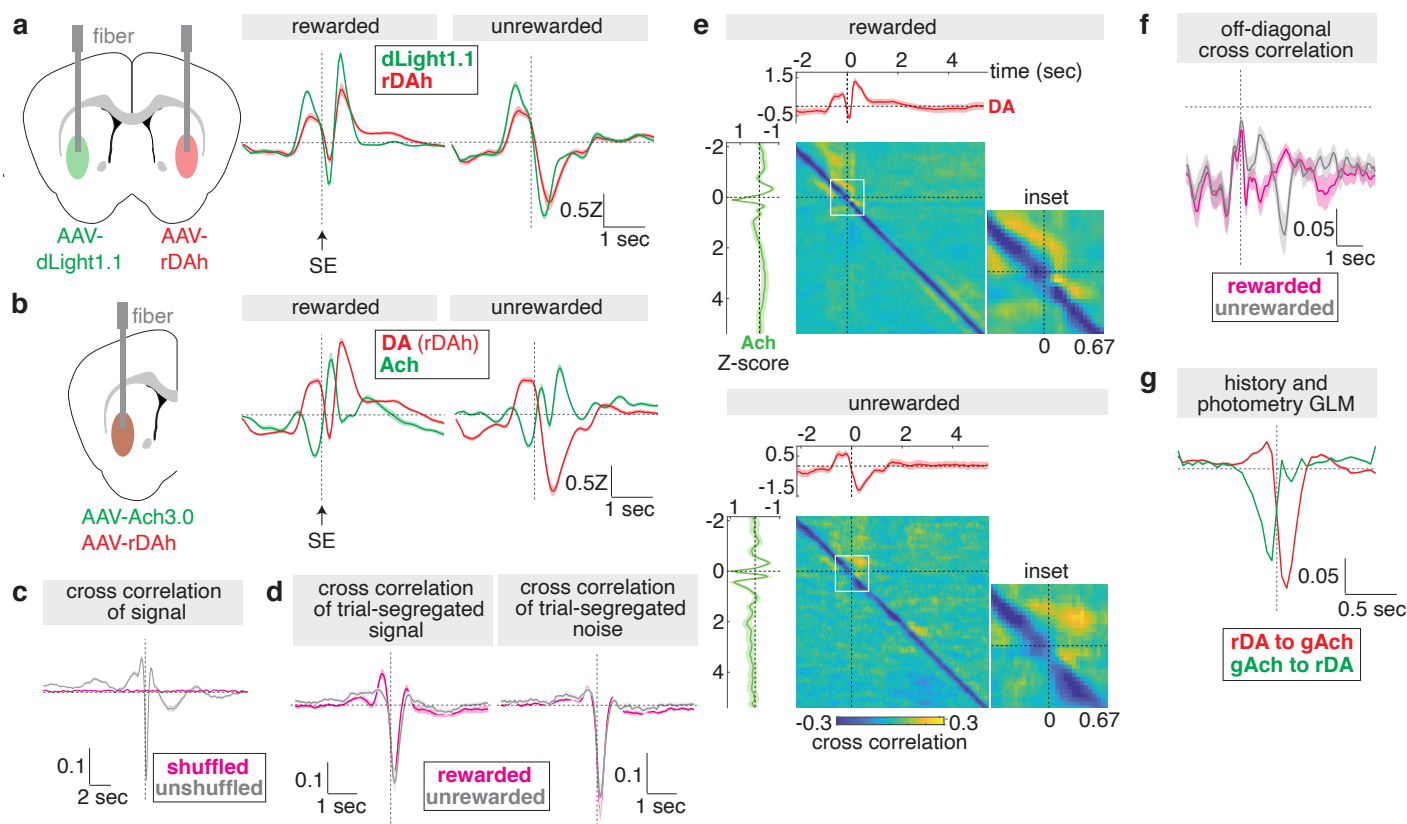

**Fig. 2 | Ach and DA signals are dynamically correlated during reward-based decision making**

- Comparison of DA release detected by dLight1.1 and rDAh (middle and right) recorded from mice with the indicated bilateral injections (left). The average Z-scored sensor signals are shown (bold line), with standard error of the mean (SEM) overlaid (shaded region; errors are often smaller than line thickness). Data are aligned to side port entry (SE) ( $n = 3$  mice).
- Overlay of DA and Ach dynamics recorded simultaneously for the indicated trial types (middle and right). Schematic of the injection strategy (left). Data are depicted as in (a) ( $n = 6$  mice).
- Covariance of DA and Ach signals recorded across an entire behavioral session, compared to shuffled data. The average covariance is depicted (bold line) with the standard error (shaded region) ( $n = 6$  mice).
- Covariance of trial-segregated DA and Ach signals (left) and their noise (right) in which DA lags Ach by the indicated time. Data are depicted as in (c).
- Full time-dependent covariance analysis of DA and Ach signals in rewarded and unrewarded trials. The average DA and Ach signals (bold lines) with SEM (shaded region) are shown within the top and left subplots, respectively. An enlarged inset of the region outlined in the white box is shown to the right of each matrix, with the time (sec) indicated on the bottom of the inset ( $n = 6$  mice).
- Summary of the off-diagonal negative covariance calculated from the matrices in (e).
- Photometry kernels produced by a GLM which incorporates behavioral, history, and photometry variables. The kernels (bold lines) that predict Ach signals from rDAh signals (rDA to gACh) and DA signals from Ach3.0 signals (gACh to rDA) are shown with respect to the time shift, with the confidence interval (shaded region) overlaid ( $n = 6$  mice).



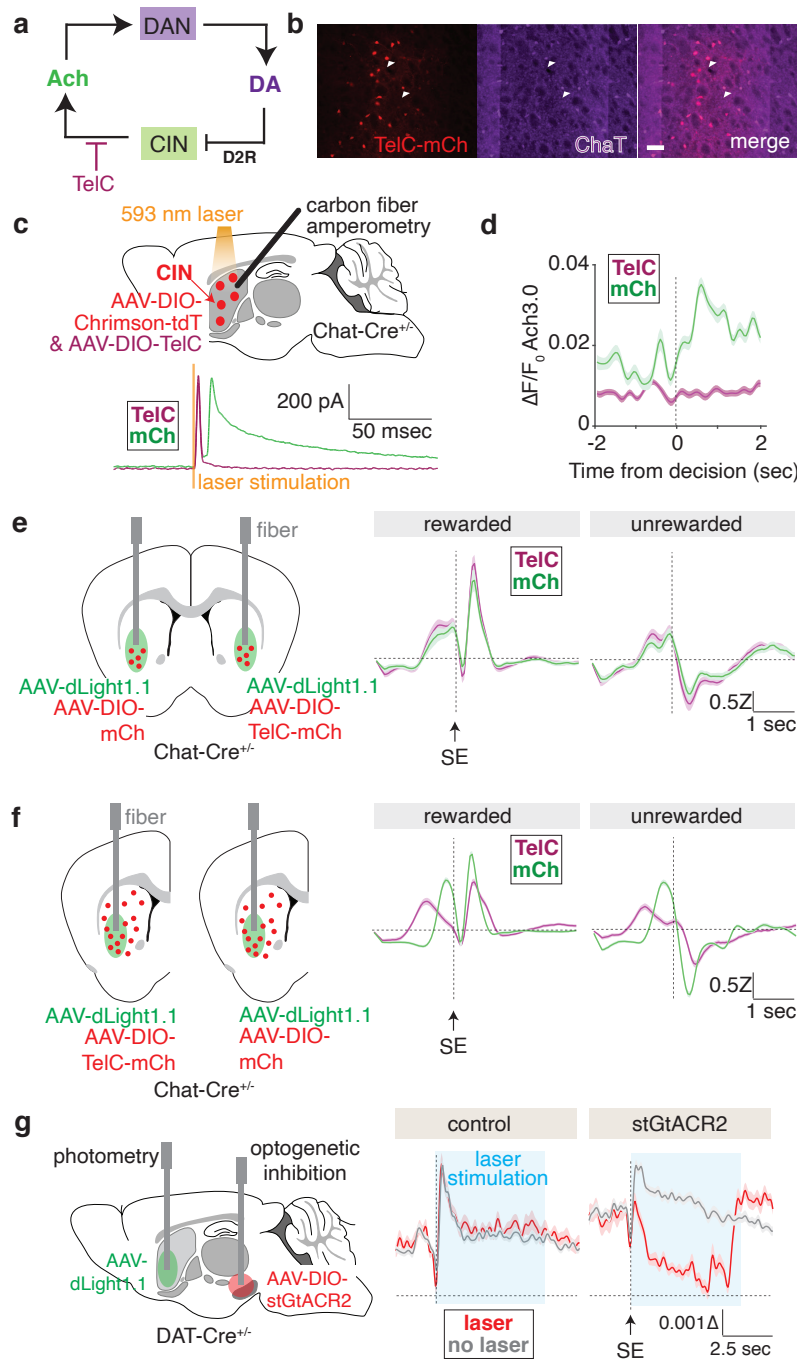

### Fig. 3 | Ach does not regulate DA dynamics during decision-making

- Schematic of the tetanus toxin (TeIC) perturbation of Ach release.
- Epifluorescence images of tetanus toxin linked to mCherry (TeIC-mCh) expressed in choline acetyltransferase (ChaT)-positive cells in the VLS. Scale bar (white): 200  $\mu\text{m}$ .
- Carbon fiber amperometry in an acute striatal slice containing CINs coexpressing Chrimson with either a control protein mCherry (mCh) or TeIC. Schematic of the experimental setup (top) and amperometry recordings aligned to laser stimulation (bottom).
- Ach release in VLS during rewarded trials recorded with fiber photometry in mice with CINs expressing mCh or TeIC. The average  $\Delta F/F_0$  of the sensor signal (bold line) is aligned to side port entry (SE) with standard error of the mean (SEM) overlaid (shaded region) ( $n = 3$  mice).

- e.** Injections and implantations for fiber photometry experiments to measure DA release in the presence of CIN-specific expression of TeiC or mCh in separate hemispheres of the same brain (left). DA release during rewarded and unrewarded trials from these mice (middle and right). The side-entry (SE) aligned average Z score of the sensor signal is shown (bold line) with SEM overlaid (shaded region) (n = 4 mice).
- f.** Injections and implantations for fiber photometry to measure DA release in the context of striatum-wide expression of mCh or TeiC in CINs (left). Unilateral injections were performed in two separate cohorts of mice. DA release during rewarded and unrewarded trials from these mice (middle and right). Data are depicted as in (e) (n = 5 mice per condition).
- g.** Optogenetic inhibition of midbrain DAN cell bodies with simultaneous recordings of DA release in VLS. Schematic of the injections and implantations (left), and summary of DA release during the 2ABT from mice lacking opsin expression (middle) or mice expressing the inhibitory opsin stGtACR2 (right). Average  $\Delta F/F_0$  of dlight1.1 is indicated (bold line) with SEM overlaid (shaded region) (n = 3 mice).

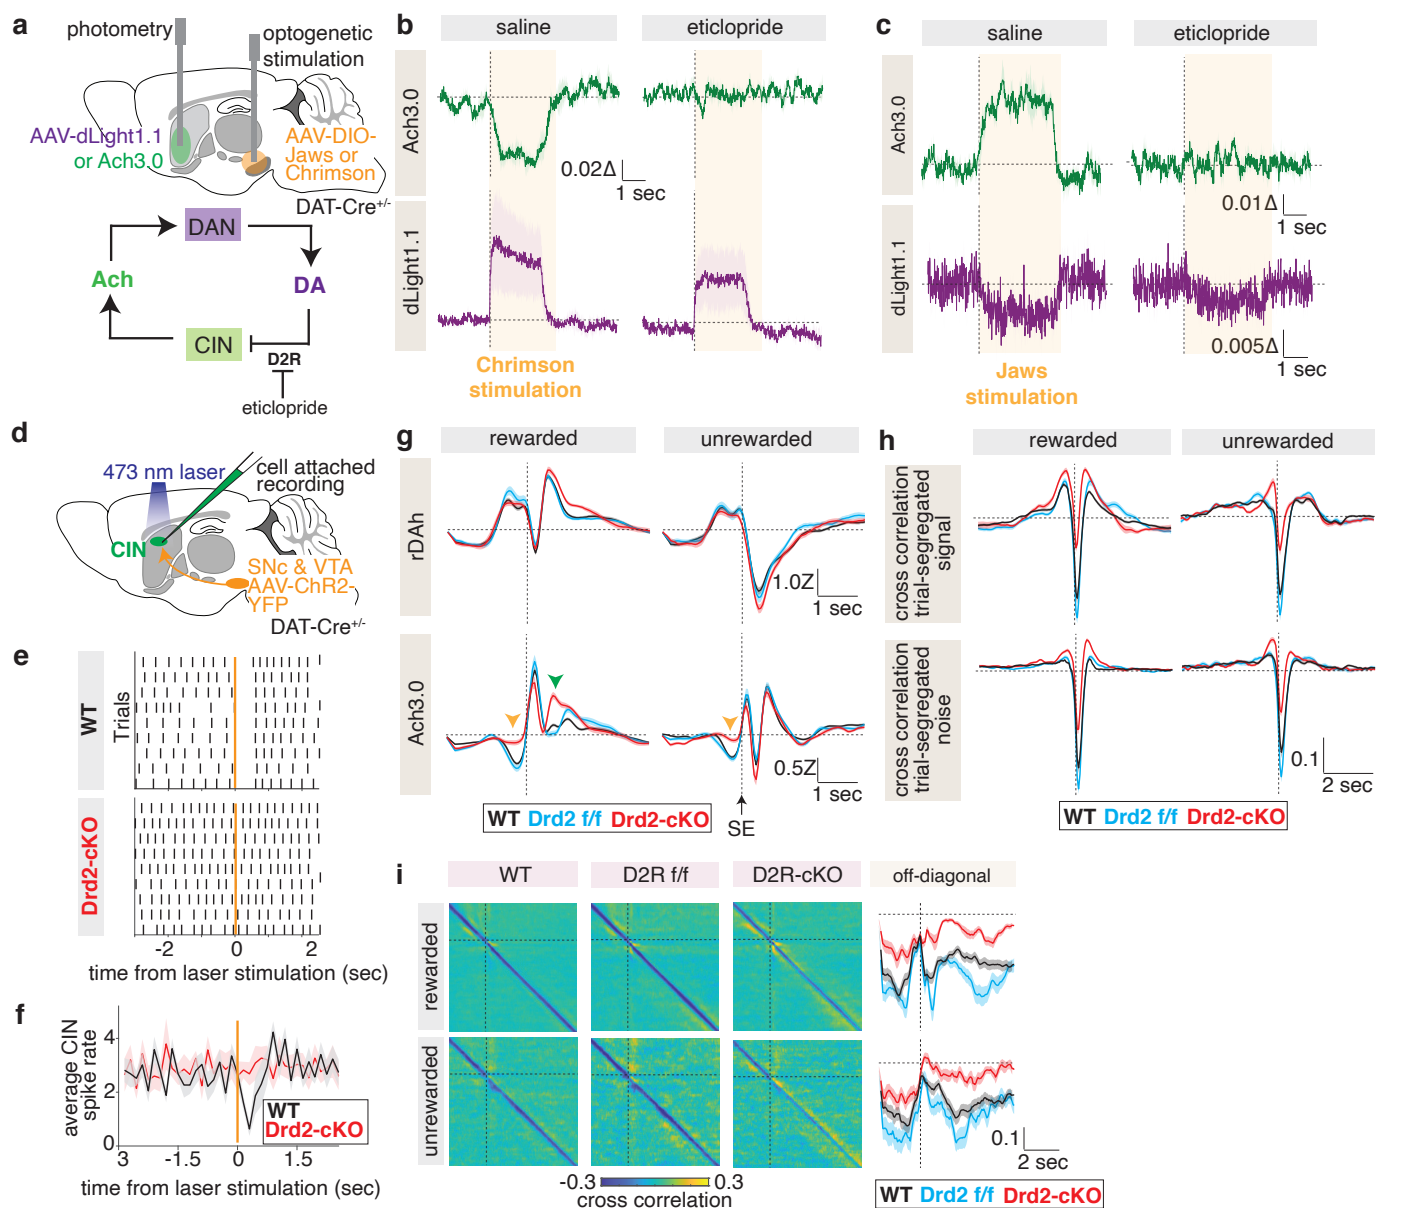

**Fig. 4 | D2Rs are required for DA-mediated inhibition of Ach signals**

- Schematic illustrating the injection and fiber implantation strategy (top). Eticlopride, a D2R antagonist, was applied during these recordings (bottom).
- Ach and DA release during Chrimson-mediated optogenetic activation of DAN somas with an intraperitoneal injection of saline (left) or eticlopride (right) prior to the recording. Average  $\Delta F/F_0$  is shown (bold lines) with standard error of the mean (SEM) overlaid (shaded region) ( $n = 3$  mice). Data are aligned to the onset of laser stimulation (dashed vertical line).
- Ach and DA release during Jaws-mediated optogenetic inhibition of DAN somas with an intraperitoneal injection of saline (left) or eticlopride (right) prior to the recording. Data are depicted as in (b) ( $n = 3$  mice).
- Schematic illustrating the injection and recording setup to determine the effect of DA release on CIN firing in an acute striatal slice. ChR2-positive DAN afferents (orange) are activated with a 473 nm laser pulse, and CIN firing is recorded with a cell attached pipette (green).
- Representative single cell responses to optogenetic activation (orange) of ChR2-positive DAN afferents recorded from CINs with D2R expression (WT) or without it (Drd2-cKO). Each bold vertical line denotes a CIN action potential.
- Population perievent spike histograms of average spike discharge (solid lines) with SEM (shaded region) for cells recorded in (d) (WT:  $n = 9$  cells; Drd2-cKO:  $n = 9$  cells).
- Simultaneous trial-averaged Ach and DA recordings from the indicated genotypes, aligned to side port entry (SE). Average signals are depicted (bold) with SEM overlaid (shaded region) (WT:  $n = 12$  mice; Drd2 f/f:  $n = 7$  mice; Drd2-

cKO: n = 8 mice). An orange arrow denotes the increase in Ach signal that occurs when the mice move from center to side port, and a green arrow denotes this change in Ach signal after side port entry.

- h.** Covariance of DA and Ach dynamics in mice shown in (**g**), in which DA lags Ach by the indicated time. Analyses of the trial-segregated signals (top) and their residuals (bottom) are shown for the indicated trial types. Average covariance is depicted (bold line) with SEM outlined (shaded region).
- i.** Moment-to-moment covariance matrix for mice in (**g**) of DA and Ach release in rewarded and unrewarded trials with their respective off-diagonal signals (bold lines) and SEM overlaid (shaded region) (far right).

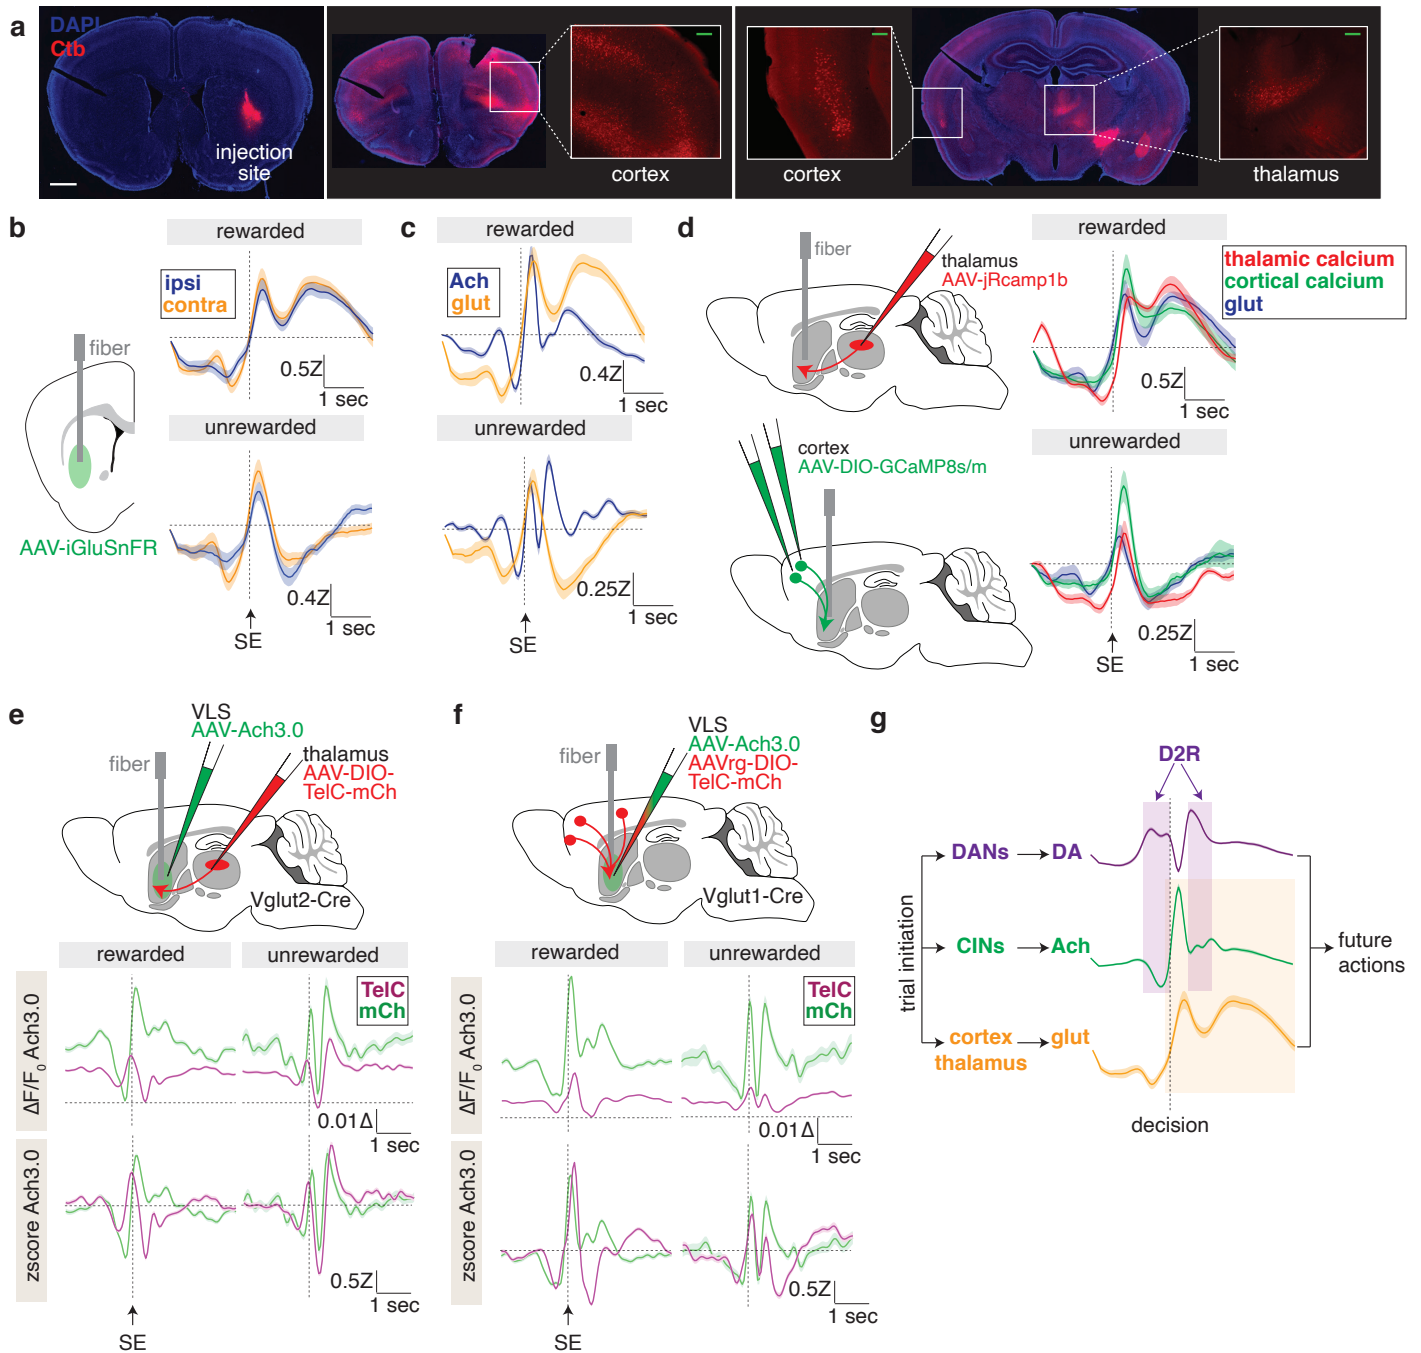

**Fig. 5 | Corticostriatal and thalamostriatal inputs are necessary to drive Ach signals in the VLS**

- Retrograde labelling of cortex and thalamus with cholera toxin (Ctb) injected in the VLS. A representative mouse is shown. Epifluorescence images of the injection site (left) and representative coronal sections that depict Ctb-positive cortical cell bodies (middle) and thalamic cell bodies (right). Scale bar (white): 1 mm; Scale bar (green): 200  $\mu$ m.
- Glutamate release from ipsilateral versus contralateral 2ABT trials measured with the iGluSnFR sensor (left). Average signals (bold lines) are aligned to side port entry (SE) with standard error of the mean (SEM) overlaid (shaded region) (right) ( $n = 4$  mice).
- Overlay of glutamate and Ach release recorded from separate mice during the indicated trial types. Data is presented as in (b) (glutamate:  $n = 4$  mice; Ach:  $n = 9$  mice).
- Injection and fiber implantation scheme for photometry of calcium dynamics in thalamic (upper left) and cortical (lower left) terminals in the VLS. Two injections were required to cover the medial-lateral spread of cortical cells that project to VLS. Overlay of thalamic calcium, cortical calcium, and VLS glutamate signals (right) in the VLS of separate mice for the indicated trial types. Data are depicted as in (b) (glutamate:  $n = 4$  mice; thalamic calcium:  $n = 6$  mice; cortical calcium:  $n = 5$  mice).

- e. Injection strategy and fiber implantation for tetanus (TelC) or mCherry (mCh) expression in thalamus with Ach recordings in VLS (top).  $\Delta F/F_0$  (middle) and Z scored signals (bottom) of the mean Ach release from the indicated treatment groups (TelC: tetanus; mCh: mCherry). Data are depicted as in (b) (mCh: n = 3 mice; TelC: n = 5 mice).
- f. Injection strategy and fiber implantation for TelC or mCh expression in cortex with Ach recordings in VLS (top).  $\Delta F/F_0$  (middle) and Z scored signals (bottom) of the average Ach release from the indicated treatment groups. Data are depicted as in (b) (mCh: n = 4 mice; TelC: n = 5 mice).
- g. Summary of findings. Trial initiation evokes the release of multiple neurotransmitters in the VLS, all of which interact and influence decision making. Glutamate release from cortex and thalamus are necessary to promote Ach release (orange shaded box), while DA release inhibits it at specific trial moments via D2Rs (purple shaded boxes). Altogether, this guides future actions.

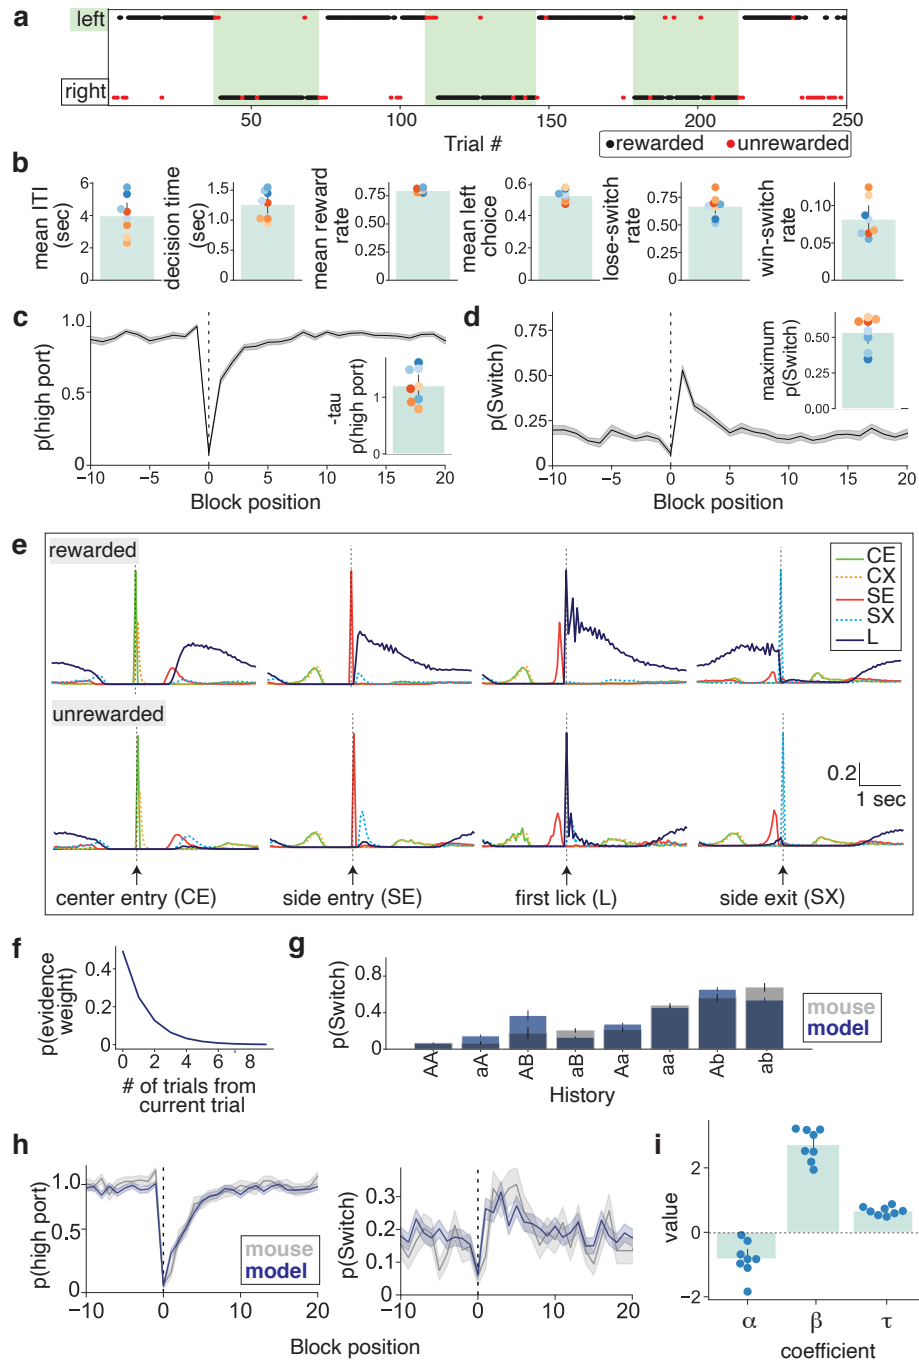

### Extended Data Fig. 1 | Baseline behavior and behavioral modeling of mouse performance in the 2ABT

- Baseline expert behavior during a 2ABT session for a representative mouse. Green and white shading denote the left port and right port, respectively, as being the higher rewarded port. The location of dots represents a choice made by the mouse. A choice resulting in a rewarded outcome is indicated with a black dot while a red dot represents an unrewarded trial.
- The average intertrial interval (ITI) and decision time, and the rate of rewarded trials, left choice, and switching following an unrewarded (lose-switch) or rewarded (win-switch) outcome on the previous trial for a representative group of mice. Each colored dot represents a unique mouse ( $n = 7$ ). Error bars denote the 95% confidence interval.
- Probability of occupancy at the highly rewarded port ( $p(\text{high port})$ ) as a function of block position. The average is indicated with a bolded line and the standard error of the mean (SEM) is overlaid in the shaded region. Calculated taus are shown (inset), with each dot representing a unique mouse and error bars denoting the 95% confidence interval. Tau is the time constant of recovery to the higher rewarded port, in units of trial number.
- Probability of switching ports ( $p(\text{Switch})$ ) as a function of block position and the maximum probability of switching (inset), which is defined across all block positions. Data is shown as in (c).

- e. Average timing of behavioral events in rewarded and unrewarded trials. The data are aligned to the indicated behavioral events: center port entry (CE), center port exit (CX), side port entry (SE), side port exit (SX), and first lick (L) ( $n = 7$  mice).
- f. Evidence weights as a function of the indicated number of trials from the current one. Evidence weights are defined as the proportion of evidence that each trial contributes to the mouse's action and reward history, calculated based on the average  $\tau$  coefficient in (i).
- g. Conditional switch probabilities for each action-outcome trial sequence of history length two, sorted by increasing switch probability. The original data (gray) is overlaid with the data predicted by the recursively formulated logistic regression RFLR model (blue). The bar heights show the mean switch probability across mice for each corresponding sequence history, and the error bars depict the binomial standard error for the mouse test data.
- h. RFLR predicted probability (blue) of choosing the highly rewarded probability port (left) and of switching ports (right) as a function of trial number from the block transition at zero, as compared to the mouse behavior (gray). The mean across trials (bold line) at the same block position and the standard error (shaded region) are shown.
- i. Summary of the  $\alpha$ ,  $\beta$  and  $\tau$  coefficients from the RFLR model. Each blue dot represents an individual mouse. Error bars denote the 95% confidence interval.



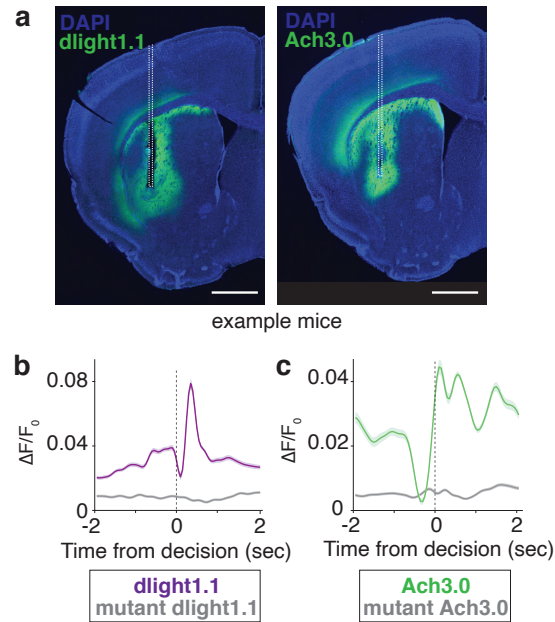

### Extended Data Fig. 2 | Histology and photometry controls for DA and Ach recordings in the VLS

- Histology depicting dlight1.1 expression (left) and Ach3.0 expression (right) in representative mice. The optical fiber tract is indicated with the dashed white line. Scale bar: 1 mm.
- Average  $\Delta F/F_0$  of DA release during rewarded trials from dlight1.1 or the DA-binding mutant of dlight1.1 (n = 4 mice). Signals (bold line) are aligned to side port entry with the standard error overlaid (shaded region).
- Average  $\Delta F/F_0$  of Ach release during rewarded trials from Ach3.0 or the mutant version of Ach3.0 (n = 4 mice). Signals are depicted as in (b).

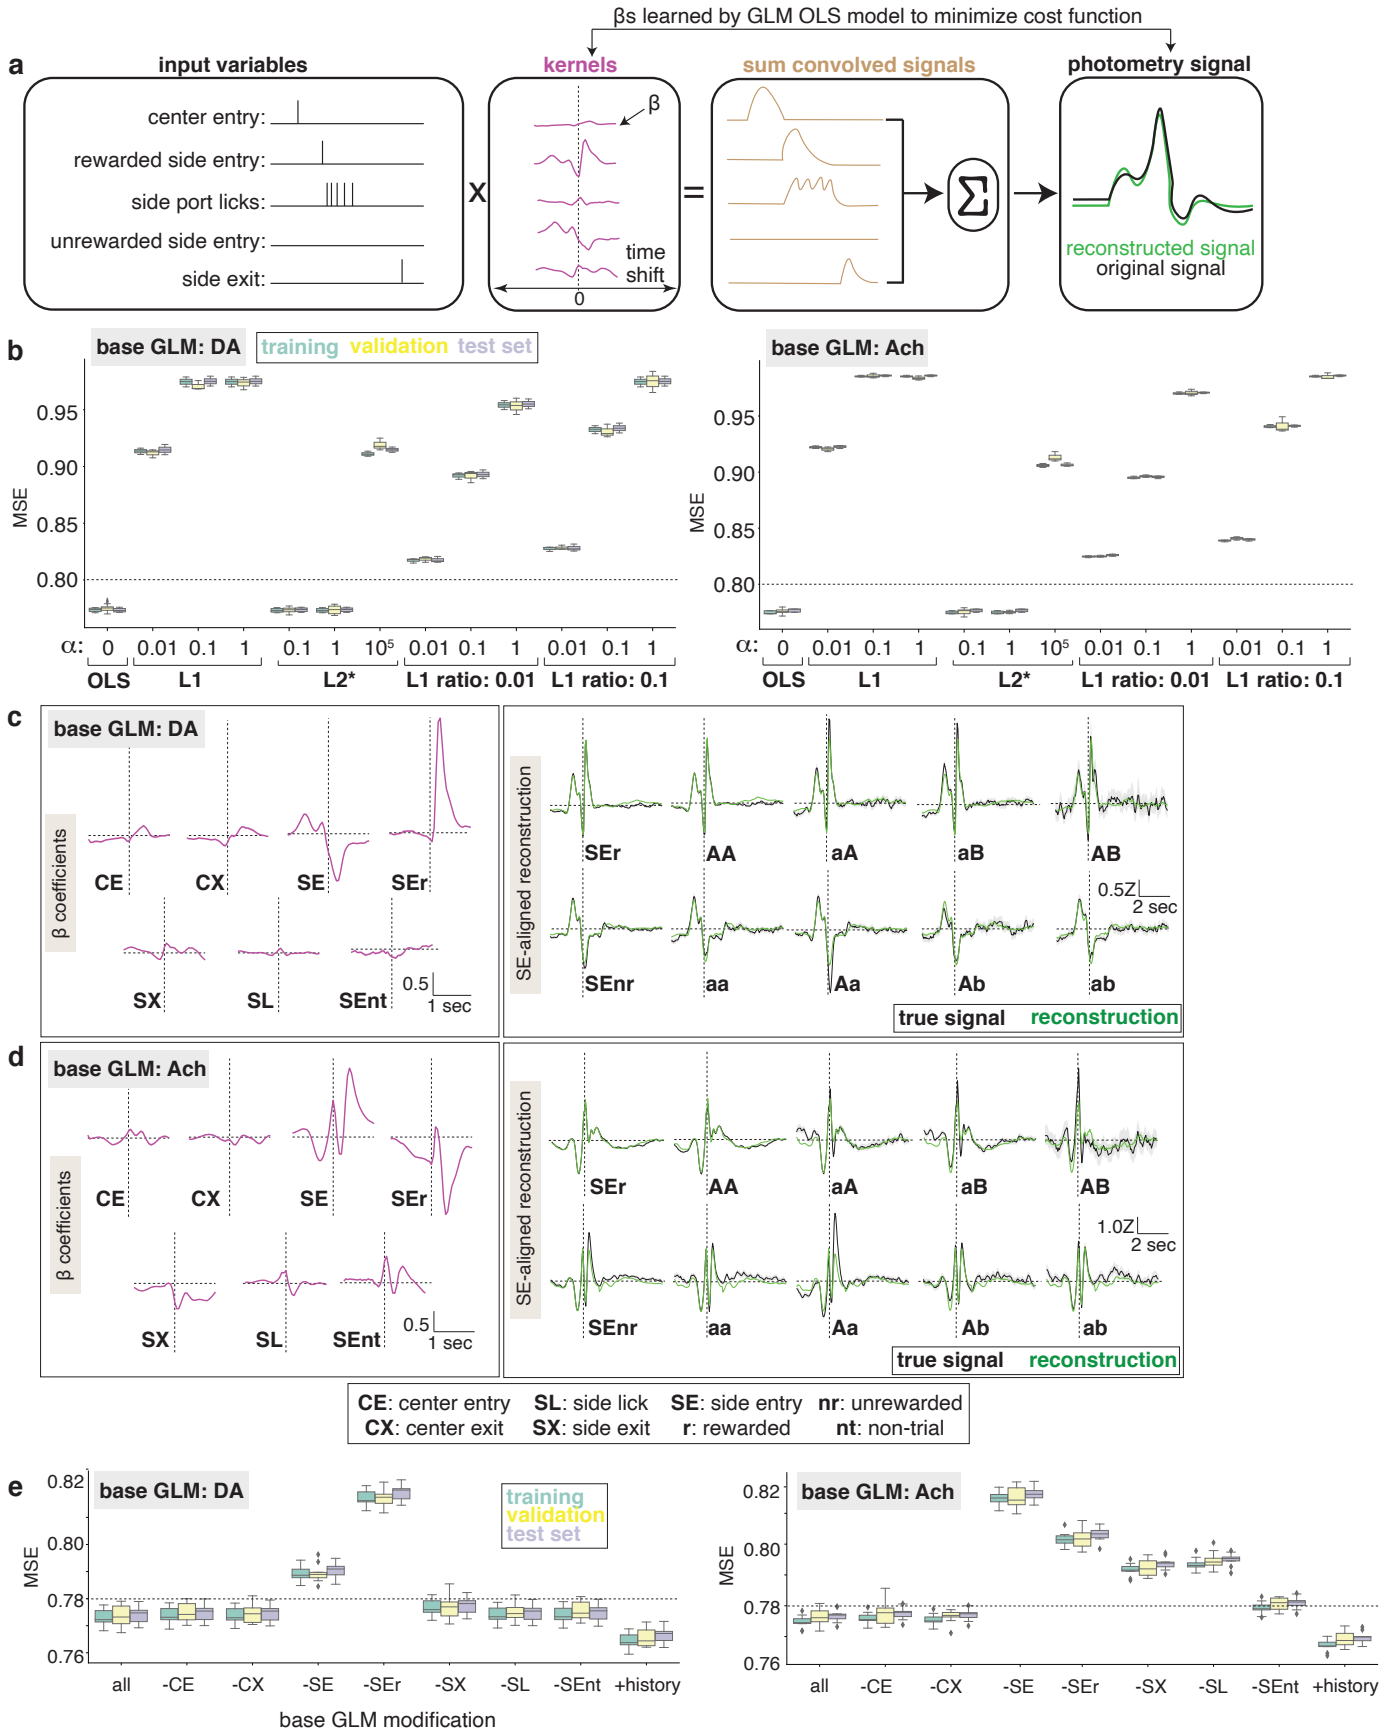

Extended Data Fig. 3 | General linear models (GLMs) of DA and Ach with a base behavior feature set

- a. Schematic of the GLM workflow. A set of input variables are convolved with their associated time-based kernels, with each time step consisting of a separate  $\beta$  coefficient fit by minimizing an ordinary least squares (OLS) cost function. The resulting convolved signals are summed to generate the reconstructed photometry signal.
- b. The effect of different hyperparameter sweeps over models associated with Least Squares Regression – OLS, Lasso Regression (L1), Ridge Regression (L2), and Elastic Net (L1+L2) on the training, validation, and test set mean squared errors (MSE) of the DA (left) and Ach (right) base GLMs.
- c. DA kernels (left) and side entry (SE) aligned reconstructed and true DA signals (right) for the base GLM model. The average signal (bold line) and 95% confidence interval (shaded region) are depicted (n = 8 mice).
- d. Ach kernels (left) and SE-aligned reconstructed and true Ach signals (right) for the base GLM model. Data is depicted as in **(b)** (n = 9 mice).
- e. The effect of omission (-) or inclusion (+) of the indicated input variables on the DA (left) and Ach (right) base GLM performance, as measured by the effect on training, validation, and test set MSE.

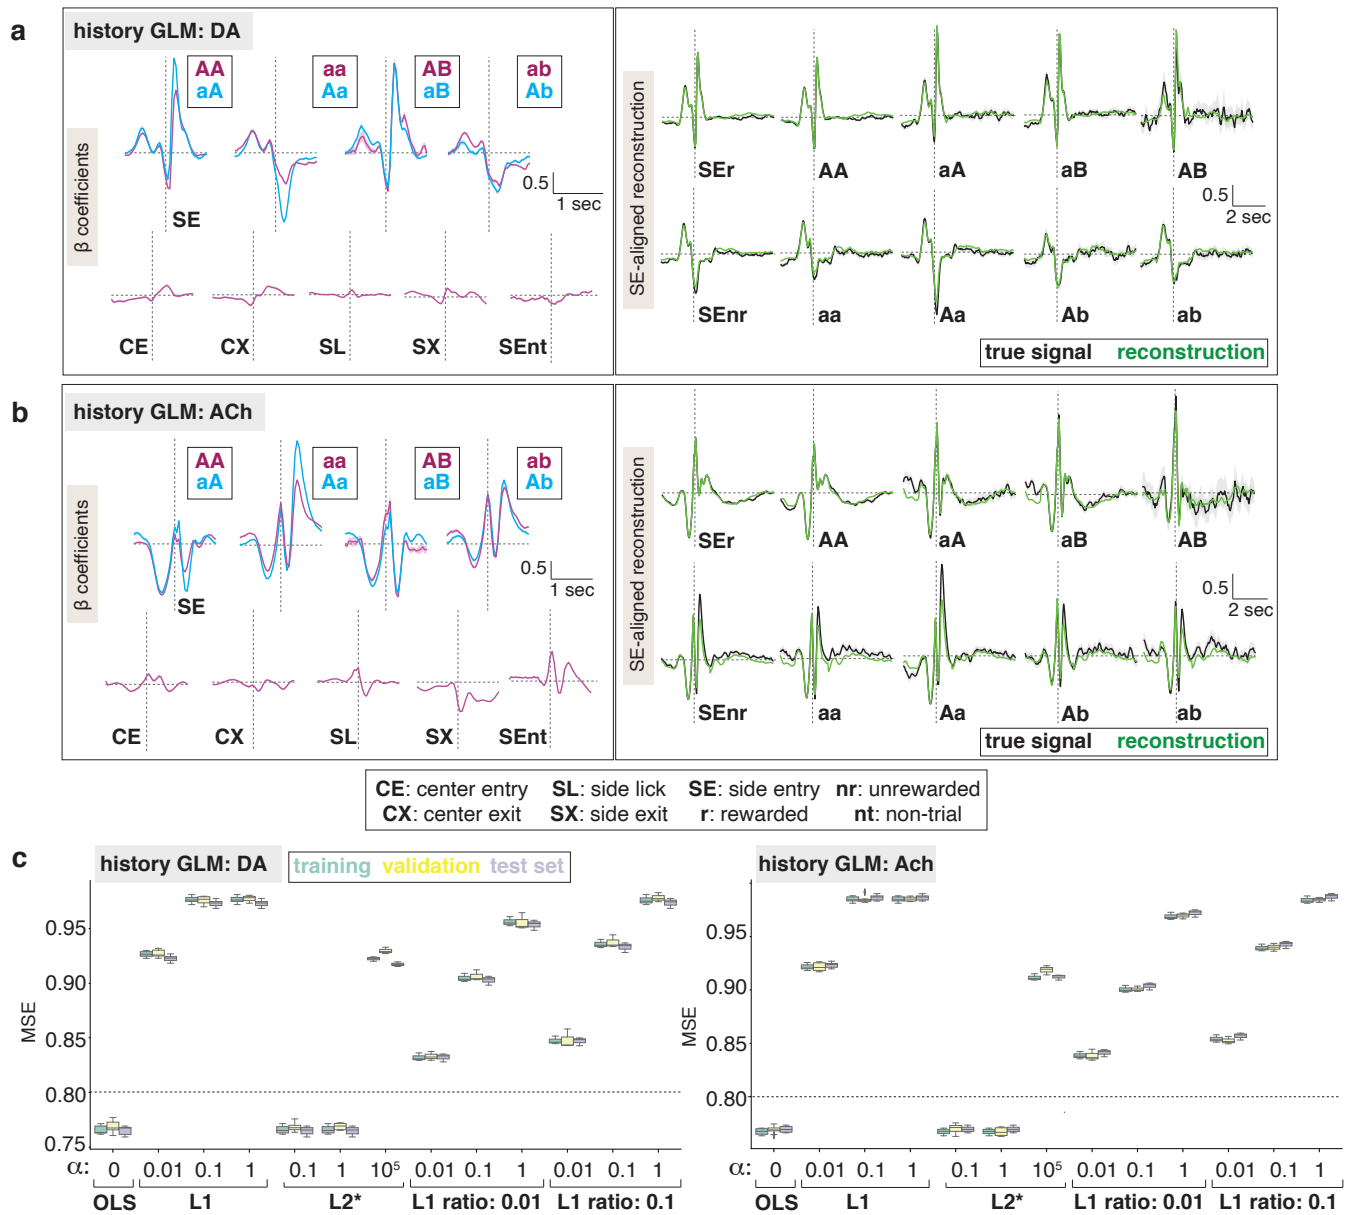

#### Extended Data Fig. 4 | DA and Ach GLMs incorporating a history feature set

- DA kernels (left) and side entry (SE) aligned reconstructed and true DA signals (right) for the history GLM model. The average signal (bold line) and 95% confidence interval (shaded region) are depicted ( $n = 8$  mice).
- Ach kernels (left) and SE-aligned reconstructed and true Ach signals (right) for the history GLM model. Data is depicted as in (a) ( $n = 9$  mice).
- The effect of different hyperparameter sweeps over models associated with Least Squares Regression – OLS, Lasso Regression (L1), Ridge Regression (L2), and Elastic Net (L1+L2) on the training, validation, and test set mean squared errors (MSE) of the DA (left) and Ach (right) history GLMs.

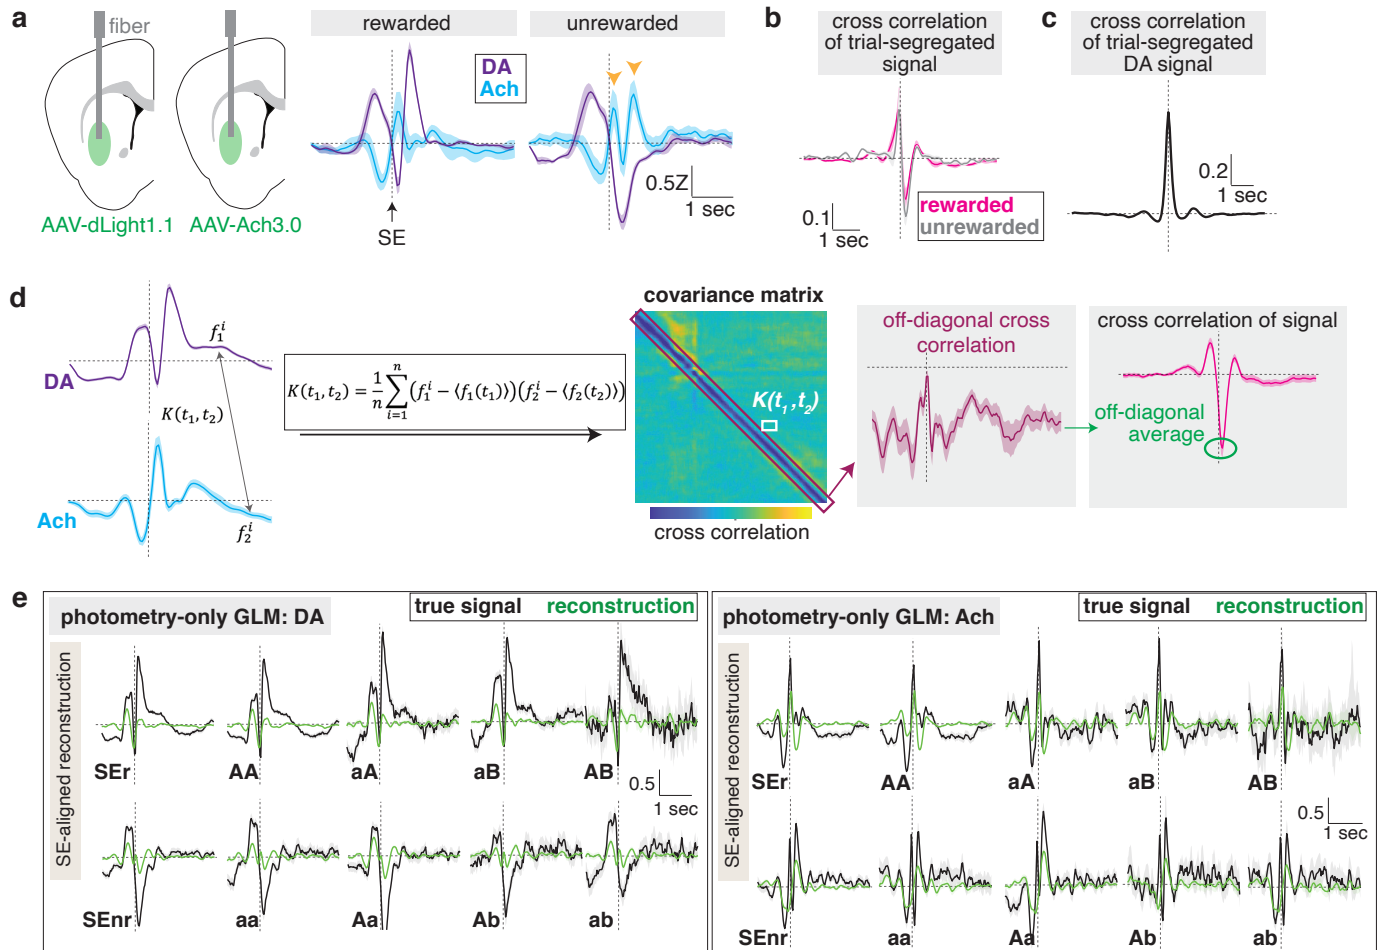

### Extended Data Fig. 5 | Cross correlation and GLM analyses of DA and Ach signals

- Injection and implantation scheme for VLS recordings of DA and Ach release from separate mice (left). The average Z score of the sensor signal (bold line) is aligned to side port entry (SE) (middle and right) with the standard error (SEM) overlaid (shaded region) (DA:  $n = 7$ ; Ach:  $n = 9$  mice). Orange arrows denote the double rise of Ach referenced within the main text.
- Cross correlation of trial segregated DA and Ach signals recorded from mice in (A) for rewarded and unrewarded trials, in which DA lags Ach. The average cross correlation is shown (bold line) with the standard error indicated (shaded region).
- Cross correlation of trial segregated DA signals recorded with dLight1.1 from opposite hemispheres of the same brain ( $n = 4$  mice).
- Summary of the correlation analyses in **Fig. 2**. A covariance matrix is built by calculating the cross correlation ( $K(t_1, t_2)$ ) of the DA signal at one time point ( $f_1^i$ ) to the Ach signal at all other time points (one time point is shown as  $f_2^j$ ), and vice versa, using the indicated equation where  $\langle f_1(t_1) \rangle$  is the mean across all trials for a certain time point,  $t_1$ . In this covariance matrix, the off-diagonal signal shows a striking negative cross correlation. The average of this signal is equivalent to the minimum cross-correlation value calculated from the trial-averaged signals.
- Side entry (SE)-aligned reconstructed and true DA and Ach signals from GLMs that only incorporate a photometry variable. The average signal (bold line) and the 95% confidence intervals (shaded region) are shown.

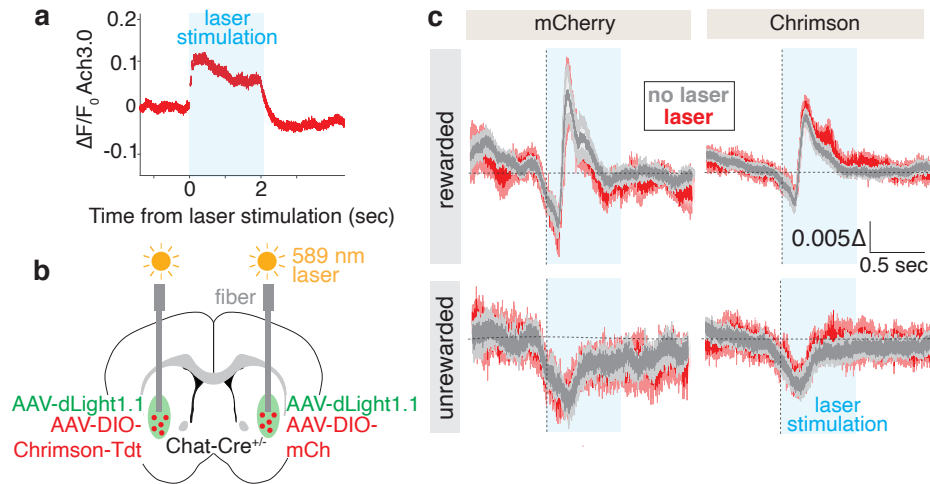

### Extended Data Fig. 6 | Optogenetic perturbations of CINs in the VLS

- Ach release upon optogenetic activation of Chrimson-expressing CINs. Average  $\Delta F/F_0$  of Ach3.0 is depicted (bold line) with standard error (SEM) overlaid (red shaded region) and the laser stimulation artifacts omitted. The duration of the laser stimulation is shown (blue shaded region).
- Injection and optical fiber implantation for animals recorded in (c). dLight1.1 is coexpressed in VLS with either Chrimson or mCherry (mCh) expressed in CINs of separate hemispheres.
- Optogenetic activation during the indicated trial types of CINs expressing Chrimson or mCherry. Average  $\Delta F/F_0$  (bold line) is depicted for trials with and without laser stimulation, aligned to side port entry (dashed vertical line), with SEM overlaid (red and gray shaded regions) and the laser stimulation artifacts omitted ( $n = 7$  mice).

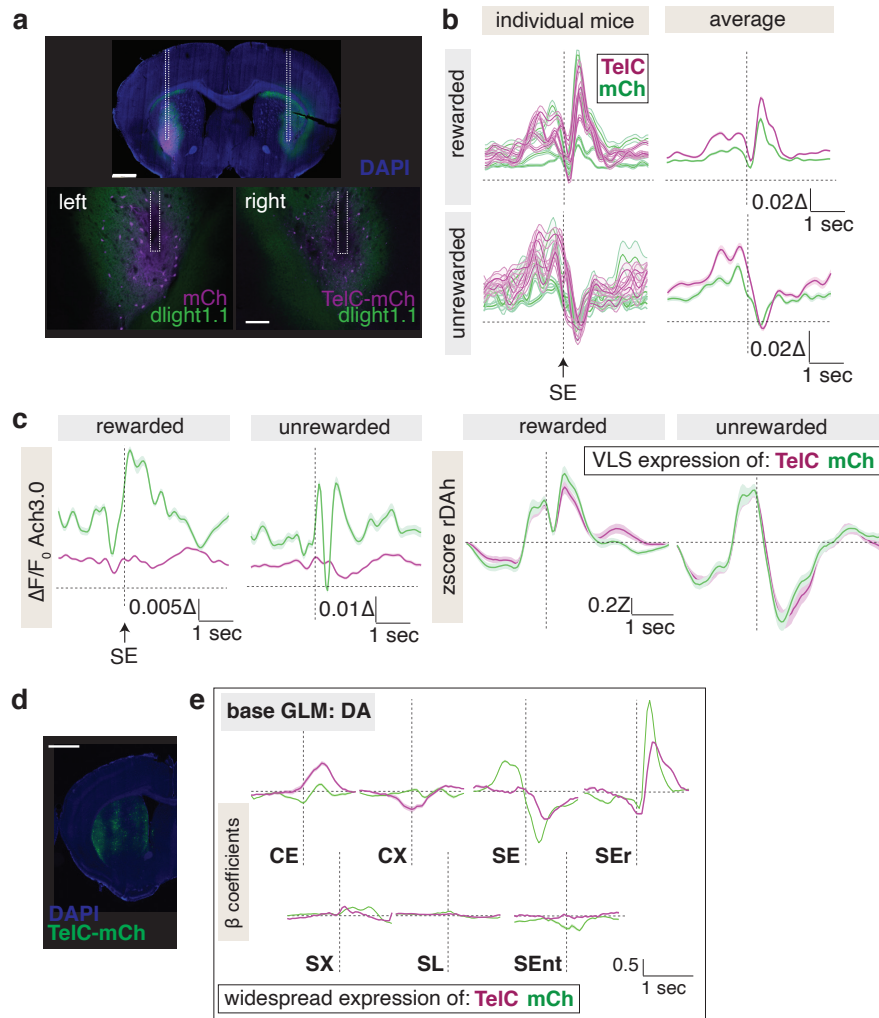

### Extended Data Fig. 7 | Histology, photometry and GLM analyses of the effects of CIN-specific tetanus expression on striatal DA signals

- Histology of a representative mouse with *dlight1.1* expression in both hemispheres and mCherry (mCh) or tetanus (TelC) expression in CINs of separate hemispheres. Fiber tract is outlined with white dashed lines. Scale bar: 1 mm.
- Effect of TelC or mCh expression in CINs on DA release. Side-entry (SE) aligned  $\Delta F/F_0$  signals for individual mice (left) and the average  $\Delta F/F_0$  (bold line) across all mice of a treatment group (right) are depicted with standard error overlaid (shaded region) ( $n = 4$  mice).
- Simultaneous recordings of Ach (left) and DA (right) signals from mice with CINs in the VLS expressing TelC or mCh. Data is represented as in (c) ( $n = 4$  mice).
- Histology from a representative mouse with TelC expression in CINs of the entire striatum. Scale bar: 1 mm.
- DA kernels for the base GLM derived from recordings in Fig. 3f with striatum-wide expression of the indicated proteins in CINs. The average signal (bold line) and the confidence interval (shaded region) are shown.

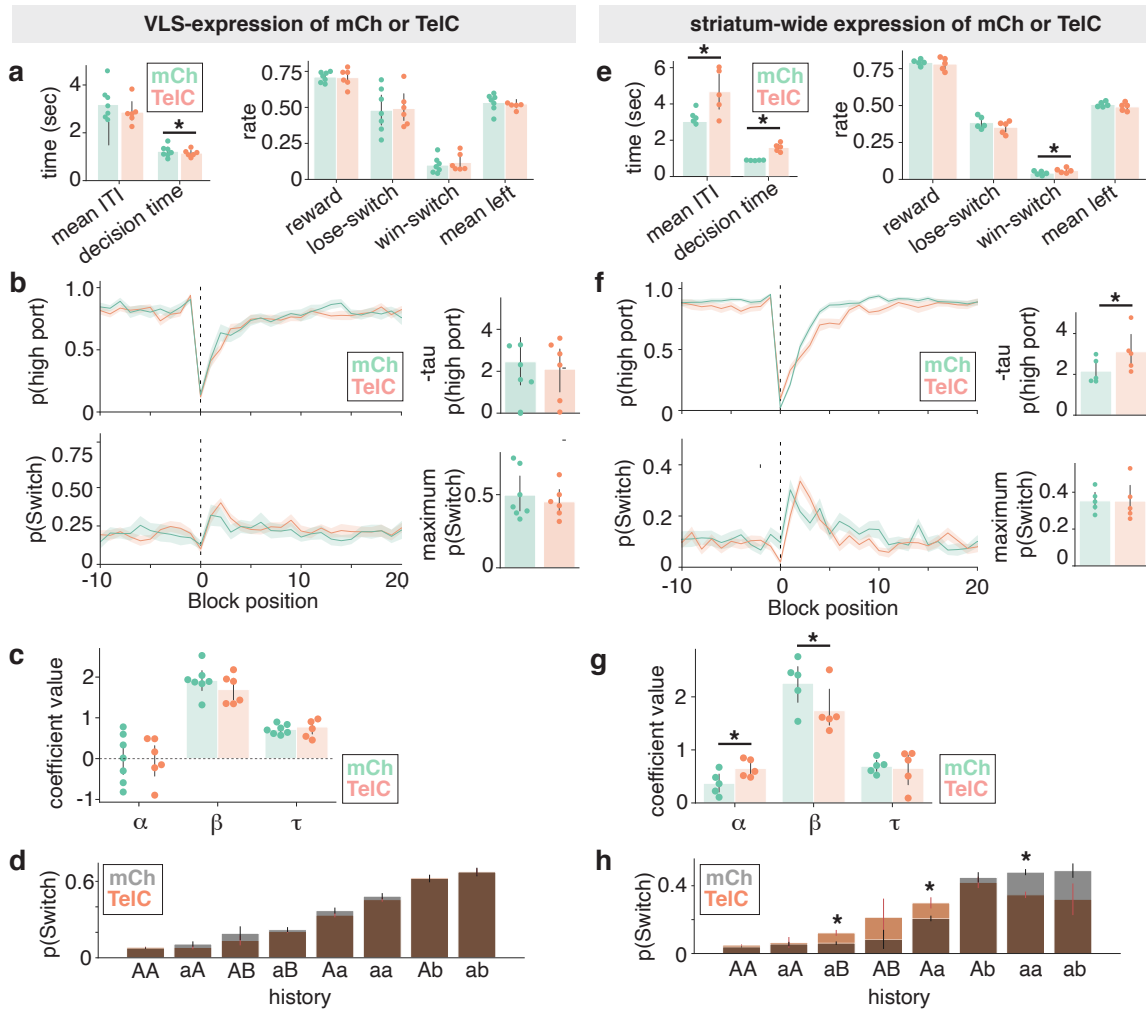

### Extended Data Fig. 8 | Behavioral analysis of mice with VLS-specific or striatal-wide tetanus expression in CINs

- Indicated performance metrics for mice from **Fig. 3e** that express tetanus toxin (TelC) or mCherry (mCh) control protein in CINs of the VLS. Each dot represents a unique mouse. Error bars denote the 95% confidence interval, and significance is determined as >95% confidence from bootstrapped samples (asterisk).
- Probability of occupancy at highly rewarded port (p(high port)) or switching (p(Switch)) as a function of block position for mice from **Fig. 3e** (left). The average is indicated with a bold line and the standard error of the mean (SEM) is overlaid in the shaded region. Calculated taus and maximum pSwitch rates (right) are shown, with each dot representing a unique mouse. Error bars denote the 95% confidence interval.
- Summary of the  $\alpha$ ,  $\beta$  and  $\tau$  coefficients generated from the RFLR model of the indicated treatment groups for mice from **Fig. 3e**. Data is depicted as in (a).
- Conditional switch probabilities for the indicated action-outcome trial sequence sorted by increasing switch probability for mice from **Fig. 3e**. Mice with CINs expressing mCh (gray) are overlaid with those expressing TelC (orange). The bar heights show the mean switch probability across mice for each corresponding sequence history, and the error bars depict the binomial standard error for the mouse test data.
- The indicated performance metrics for mice from **Fig. 3f** with striatum-wide CIN expression of TelC or mCh. Data is depicted as in (a).
- Probability of occupancy at highly rewarded port (p(high port)) or switching (p(Switch)) as a function of block position for mice from **Fig. 3f** (left). Data is depicted as in (b).
- Summary of the  $\alpha$ ,  $\beta$  and  $\tau$  coefficients generated from the RFLR model for mice from **Fig. 3f**. Data is depicted as in (c).
- Conditional switch probabilities for mice from **Fig. 3f**. Data is depicted as in (d).



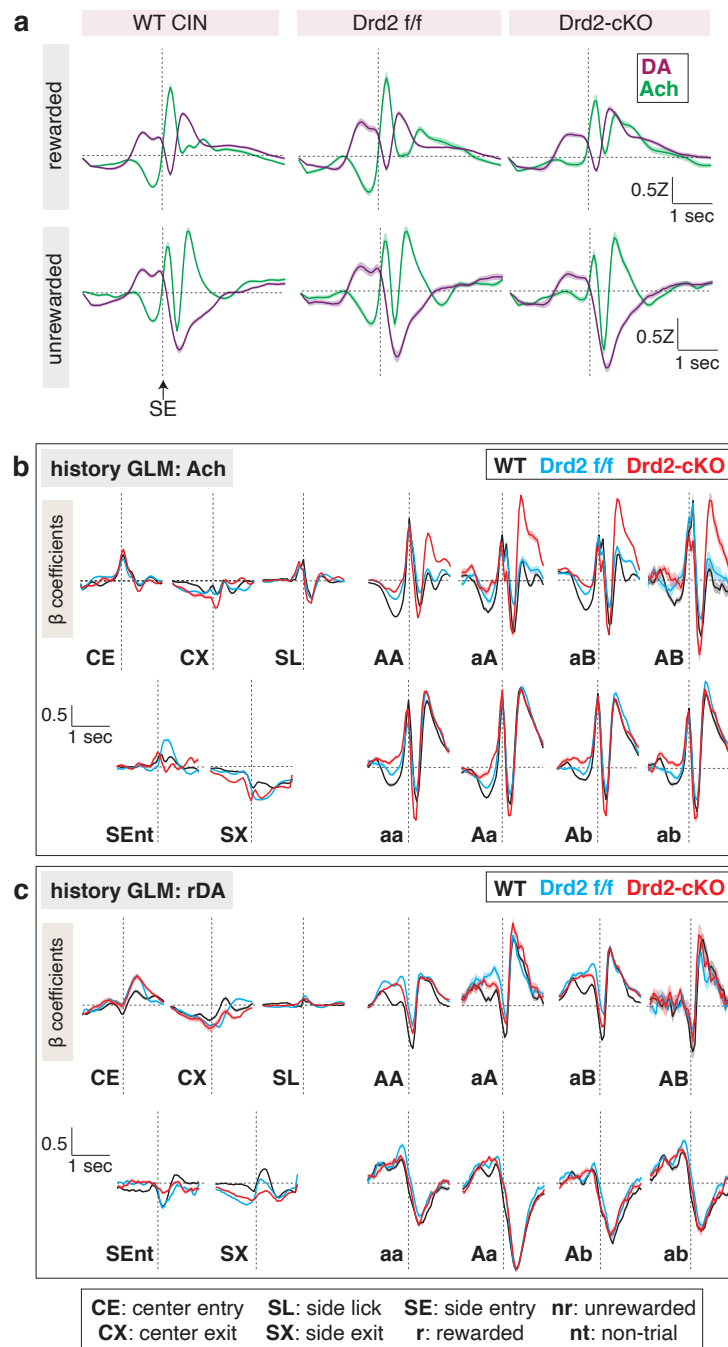

### Extended Data Fig. 9 | Photometry and GLM analyses of DA and Ach signals from mice lacking D2R expression in CINs

- Overlay of Ach and DA release aligned to side port entry (SE) recorded from mice in **Fig. 4g**. Average release is depicted (bold line) with standard error of the mean (SEM) overlaid (shaded region) (WT: n = 12 mice; Drd2 f/f: n = 7 mice; Drd2-cKO: n = 8 mice).
- Kernels of the indicated input variables for the history-based GLM of Ach signals from mice in **Fig. 4g**. Average  $\beta$  coefficients are depicted (bold line) with confidence interval outlined (shaded region).
- Kernels of the indicated input variables for the history-based GLM of rDAh signals from mice in **Fig. 4g**. Data is displayed as in **(b)**.

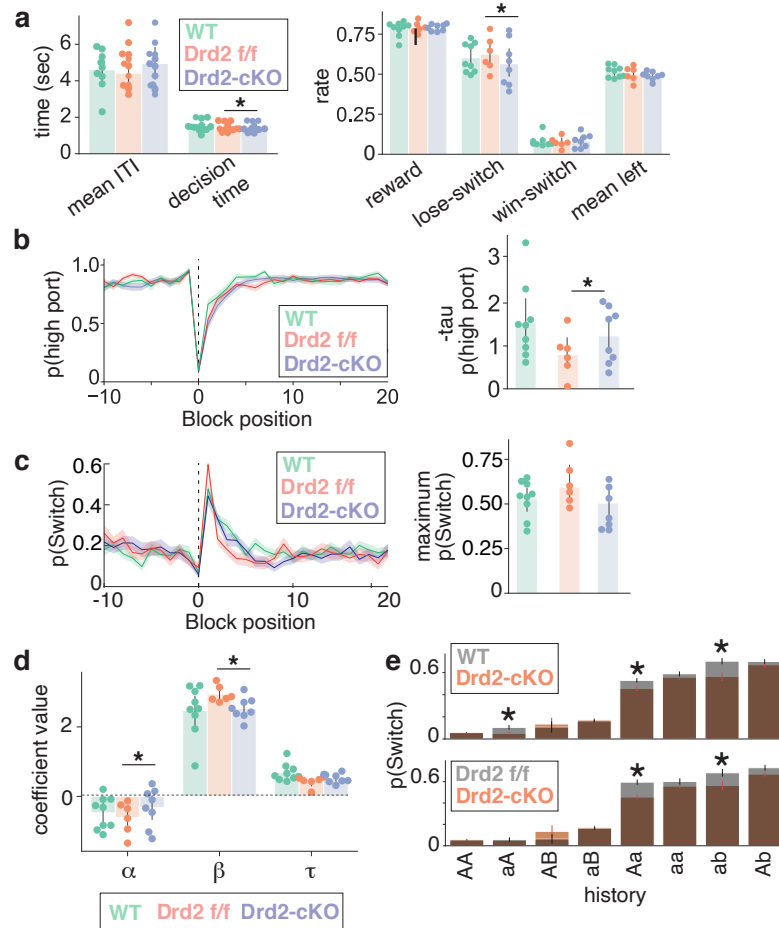

### Extended Data Fig. 10 | Behavioral effects of mice lacking D2R expression in C1Ns

- Indicated performance metrics for mice in **Fig. 4g**. Each dot represents a unique mouse with binomial error overlaid. Error bars denote the 95% confidence interval, and significance is denoted as >95% confidence from bootstrapped samples (asterisk).
- Probability of occupancy at highly rewarded port ( $p(\text{high port})$ ) as a function of block position for mice in **Fig. 4g** (left). The average is indicated with a bold line and the SEM is overlaid in the shaded region. Calculated taus (right) are shown, with each dot representing a unique mouse and error bars depicting the 95% confidence interval.
- Probability of switching ( $p(\text{Switch})$ ) as a function of block position for mice in **Fig. 4g** (left). Data is depicted as in (b). Calculated maximum switch rates (right) are shown, with each dot representing a unique mouse and error bars depicting the 95% confidence interval.
- Summary of the  $\alpha$ ,  $\beta$  and  $\tau$  coefficients generated from the RFLR model of the indicated mice in **Fig. 4e**. Each dot represents an individual mouse and error bars show the 95% confidence interval.
- Conditional switch probabilities for the indicated action-outcome trial sequence sorted by increasing switch probability for mice from **Fig. 4e**. The bar heights show the mean switch probability across mice for each corresponding sequence history, and the error bars depict the binomial standard error. Significance is denoted as >95% confidence from bootstrapped samples (asterisk).

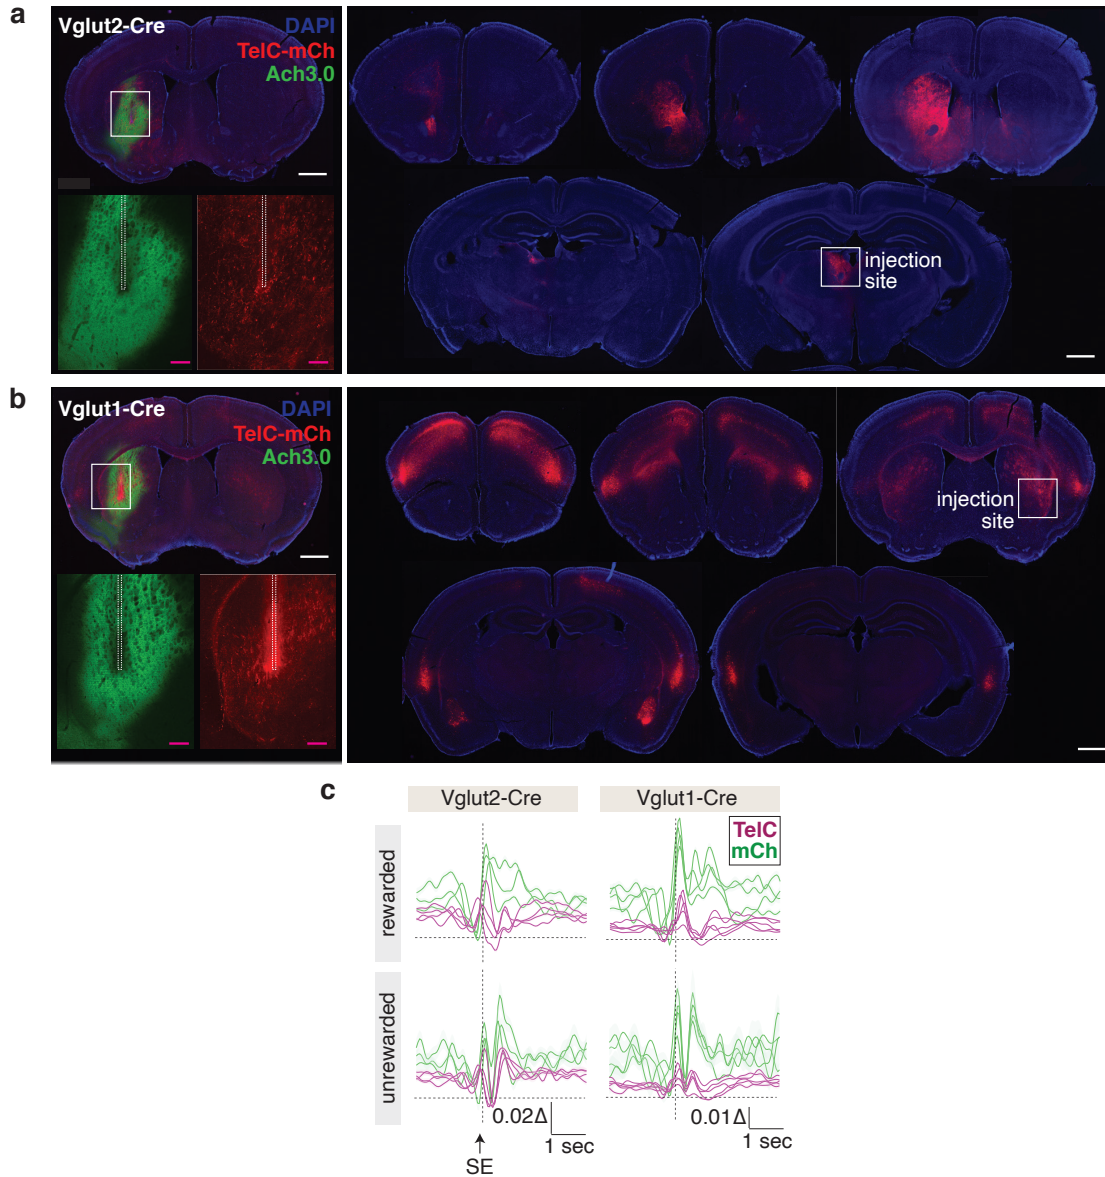

### Extended Data Fig. 11 | Histology and photometry analyses of tetanus toxin expression in cortical and thalamic inputs

- Histology of a representative mouse expressing tetanus toxin (TelC-mCh) in thalamus. Epifluorescence image of a coronal slice containing the fiber implantation site (top left) with a magnified view of the Ach3.0 and TelC expression sites (bottom left insets). Coronal slices spanning the anterior to posterior regions of the brain showing the injection site in thalamus (right) and TelC-positive terminals projecting to striatum. Scale bar (white): 1 mm; Scale bar (pink): 200  $\mu$ m.
- Example histology of a representative mouse expressing TelC toxin in cortex. Images are depicted as in (a).
- Effect of Cre-dependent TelC or mCh expression in Vglut2-Cre (left) or Vglut1-Cre (right) mice on Ach release, as measured by average  $\Delta F/F_0$  for individual mice (bold line) aligned to side port entry (SE) with standard error (shaded region) overlaid.

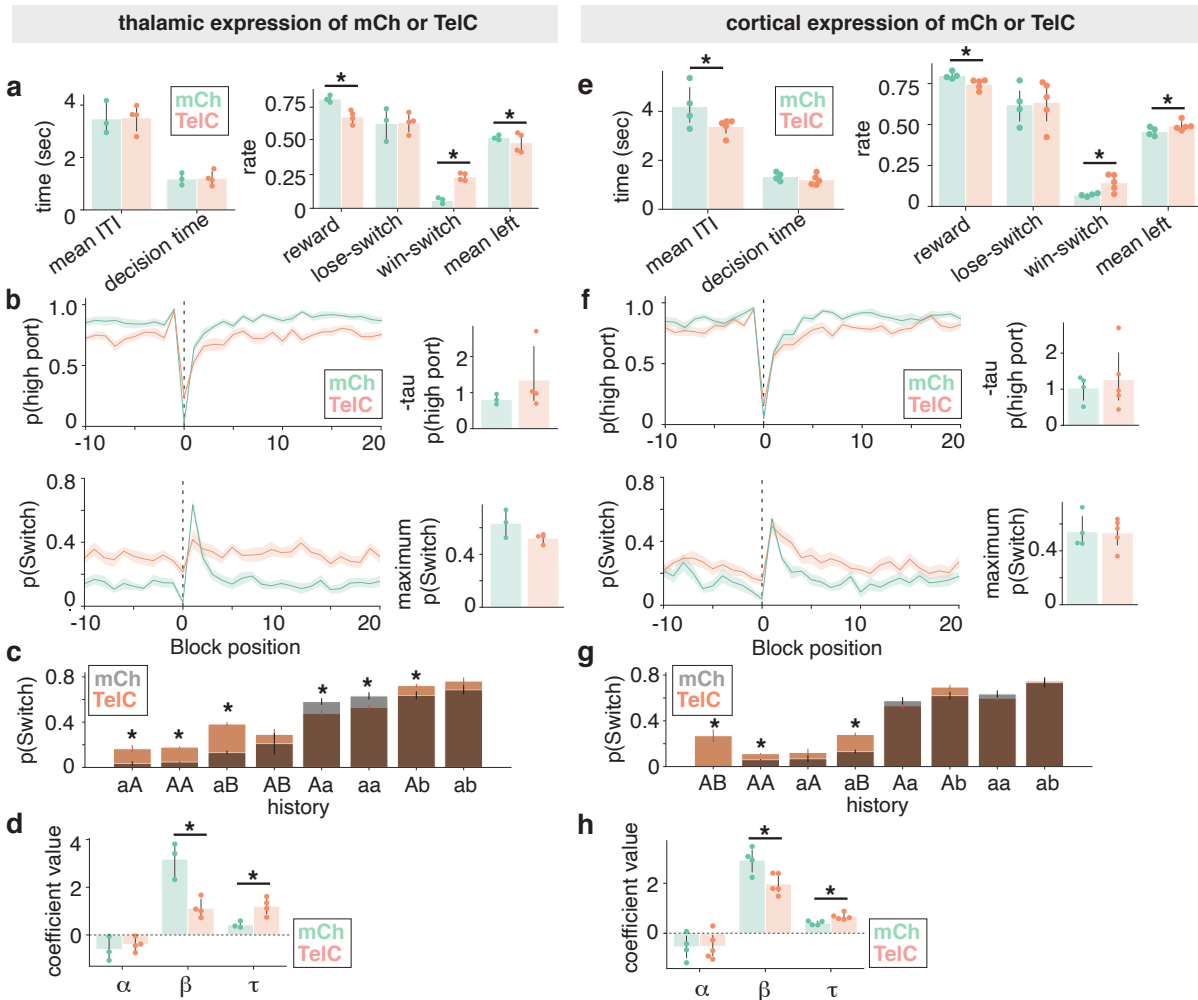

### Extended Data Fig. 12 | Behavioral effects of perturbing cortical and thalamic inputs into the VLS

- Indicated performance metrics for mice in **Fig. 5e** that express tetanus toxin (TelC) or mCherry (mCh) control protein in the thalamus. Each dot represents a unique mouse. Error bars depict the 95% confidence interval, and significance is determined as >95% confidence from bootstrapped samples (asterisk).
- Probability of occupancy at highly rewarded port ( $p(\text{high port})$ ) or switching ( $p(\text{Switch})$ ) as a function of block position (left) for mice in **Fig. 5e**. The average is indicated with a bold line and the SEM is overlaid in the shaded region. Calculated taus and maximum  $p(\text{Switch})$  rates (right) are shown, with each dot representing a unique mouse. Error bars depict the 95% confidence interval.
- Conditional switch probabilities for the indicated action-outcome trial sequences sorted by increasing switch probability for mice in **Fig. 5e**. Mice with CINs expressing mCh (gray) are overlaid with those expressing TelC (orange). The bar heights show the mean switch probability across mice for each corresponding sequence history, and the error bars depict the binomial standard error. Significance is determined as >95% confidence from bootstrapped samples (asterisk).
- Summary of the  $\alpha$ ,  $\beta$  and  $\tau$  coefficients generated from the RFLR model for mice in **Fig. 5e**. Data is depicted as in (a).
- The indicated performance metrics for mice in **Fig. 5f** that express TelC or mCh in the VLS-specific cortical inputs. Data is depicted as in (a).
- Probability of occupancy at highly rewarded port ( $p(\text{high port})$ ) or switching ( $p(\text{Switch})$ ) as a function of block position for mice in **Fig. 5f**. Data is depicted as in (b).
- Conditional switch probabilities of the indicated treatment groups for mice in **Fig. 5f**. Data is depicted as in (c).
- Summary of the  $\alpha$ ,  $\beta$  and  $\tau$  coefficients generated from the RFLR model of the indicated treatment groups in **Fig. 5f**. Data is depicted as in (d).
